# Supplementary material
Source: publisher figshare collection journal article supplement (https://sage.figshare.com/ndownloader/files/20179163)
Supplement: Supplementary file 1 [file 20179163]

## Sheet: DE71_OverallFtest_020719
probeid	FC_DE.1	FDR_DE.1	FC_DE15	FDR_DE15	FC_DE50	FDR_DE50
1367452_at	-1.04004	0.872503	-1.06878	0.780681	-1.06177	0.791368
1367453_at	-1.05517	0.716409	-1.08024	0.596555	-1.08499	0.537058
1367454_at	1.03721	0.838485	1.04858	0.796144	1.16591	0.191326
1367455_at	1.04361	0.798094	1.05371	0.762597	1.17502	0.140492
1367456_at	1.04219	0.772302	1.00879	0.962871	1.08111	0.521722
1367457_at	-1.05545	0.747567	-1.03715	0.851523	-1.10107	0.500939
1367458_at	1.01379	0.967358	-1.04626	0.887337	-1.09852	0.718867
1367459_at	1.05539	0.616787	1.02924	0.826698	1.04522	0.693951
1367460_at	-1.00606	0.973863	1.02058	0.908714	1.03909	0.797287
1367461_at	1.01993	0.911045	1.08672	0.566332	1.20548	0.0613728
1367462_at	1.04487	0.918526	1.00205	0.997132	1.01124	0.982179
1367463_at	1.05266	0.79847	1.0896	0.657741	1.0792	0.678738
1367464_at	-1.00792	0.967439	-1.01182	0.952841	1.00269	0.990521
1367465_at	1.00813	0.978244	1.04611	0.864961	1.22452	0.203638
1367466_at	-1.01931	0.91167	-1.08374	0.569233	1.01484	0.933275
1367467_at	1.00782	0.97728	1.10185	0.633458	1.15939	0.367838
1367468_at	1.08145	0.844891	-1.08443	0.849939	-1.01898	0.967524
1367469_at	-1.03136	0.847485	-1.03342	0.847449	-1.08075	0.548291
1367470_at	1.02859	0.878812	-1.10471	0.514042	1.01944	0.921309
1367471_at	1.02804	0.926217	-1.06684	0.817307	1.06888	0.797942
1367472_at	-1.00605	0.987862	-1.12694	0.673563	-1.0204	0.952317
1367473_at	-1.00852	0.96759	-1.00731	0.974443	-1.06262	0.707128
1367474_at	1.01606	0.952823	1.05997	0.814316	1.06988	0.764328
1367475_at	-1.06084	0.787732	-1.03819	0.88181	-1.09059	0.665652
1367476_at	1.02549	0.889002	1.07634	0.642118	1.0846	0.569714
1367477_at	1.03732	0.915494	1.03574	0.925764	1.0762	0.812628
1367478_at	-1.00796	0.970782	-1.04556	0.816696	1.0231	0.908703
1367479_at	1.05293	0.747212	1.03293	0.863308	1.10872	0.436961
1367480_at	1.02468	0.87719	1.0552	0.714692	-1.00236	0.99108
1367481_at	1.03375	0.894963	-1.05317	0.837096	-1.06795	0.769228
1367482_at	1.0145	0.963846	-1.04694	0.880243	-1.1233	0.62088
1367483_at	1.02983	0.83249	-1.1076	0.345811	1.0152	0.92146
1367484_at	-1.01413	0.96638	1.03557	0.915776	1.05231	0.862992
1367485_at	1.00111	0.996652	-1.04627	0.822449	1.03284	0.871217
1367486_at	1.00731	0.98822	1.1541	0.684844	1.13887	0.699043
1367487_at	-1.01174	0.971871	-1.04105	0.900107	-1.10537	0.691894
1367488_at	-1.03865	0.763872	-1.07289	0.547687	1.01509	0.917993
1367489_at	-1.10778	0.742107	-1.20884	0.506907	-1.21243	0.461428
1367490_at	1.00499	0.979426	-1.03288	0.850494	1.12018	0.308915
1367491_at	-1.03191	0.849993	1.01507	0.937995	1.00863	0.963846
1367492_at	1.00371	0.989747	-1.00396	0.989721	1.04757	0.825212
1367493_at	1.00903	0.968104	-1.02519	0.910538	-1.04032	0.837467
1367494_at	-1.00978	0.939475	-1.0396	0.731767	-1.04944	0.625264
1367495_at	-1.01326	0.969356	-1.0197	0.955662	1.06058	0.841093
1367496_at	1.00171	0.993942	1.01997	0.913755	1.03791	0.808202
1367497_at	1.01156	0.962907	1.00448	0.987916	1.00863	0.972505
1367498_at	-1.00774	0.971738	-1.12504	0.448431	-1.09336	0.564733
1367499_at	1.05462	0.819681	1.05634	0.825504	1.05371	0.822794
1367500_at	1.01989	0.936096	-1.00806	0.978153	1.01282	0.960074
1367501_at	1.01991	0.946081	1.10726	0.678751	1.17927	0.40251
1367502_at	1.06761	0.687439	1.07893	0.653626	1.1938	0.117874
1367503_at	-1.00047	0.998431	-1.00275	0.992606	1.09589	0.573016
1367504_at	1.06061	0.886764	1.17949	0.653996	1.015	0.97486
1367505_at	-1.02156	0.915394	-1.09724	0.574585	-1.03657	0.849185
1367506_at	1.01774	0.932769	1.02934	0.891145	1.10226	0.524675
1367507_at	1.04179	0.868769	1.07815	0.751713	1.04973	0.84043
1367508_at	1.07715	0.788529	1.12936	0.650241	1.20922	0.375406
1367509_at	-1.0333	0.840911	-1.04858	0.771332	-1.07147	0.616904
1367510_at	1.04092	0.858256	-1.03045	0.904658	1.06514	0.758594
1367511_at	1.02561	0.904652	-1.03843	0.860918	-1.00409	0.987405
1367512_at	1.00998	0.930797	-1.01681	0.883805	-1.00241	0.98566
1367513_at	1.00688	0.97633	1.0333	0.875689	1.01319	0.950992
1367514_at	-1.07638	0.823814	-1.06241	0.870269	1.06933	0.843774
1367515_at	1.04464	0.85209	-1.04339	0.866318	1.07338	0.738243
1367516_at	1.04554	0.738945	1.00472	0.980157	1.08406	0.477534
1367517_at	-1.03898	0.9005	1.00514	0.990031	-1.07494	0.793367
1367518_at	-1.01873	0.946653	-1.13385	0.567617	-1.10249	0.652412
1367519_at	1.06541	0.789469	1.04438	0.873909	1.37268	0.0372584
1367520_at	1.01834	0.959705	1.00889	0.983505	-1.04739	0.886867
1367521_at	1.02845	0.963035	-1.04381	0.945434	-1.16984	0.746355
1367522_at	-1.00339	0.991646	1.04543	0.863308	1.07268	0.748631
1367523_at	-1.03448	0.907196	1.02395	0.940857	-1.04736	0.867932
1367524_at	1.02159	0.948083	-1.0565	0.864082	-1.04761	0.877976
1367525_at	-1.03081	0.806295	-1.02345	0.868769	-1.07653	0.459419
1367526_at	1.01632	0.90737	1.03703	0.780505	1.01906	0.889002
1367527_at	-1.04246	0.879124	1.01037	0.975754	-1.05205	0.849857
1367528_at	1.02743	0.901559	1.01448	0.953178	1.06718	0.728801
1367529_at	1.08738	0.724937	1.09772	0.709231	1.17692	0.406278
1367530_at	-1.00118	0.997297	-1.0168	0.957734	1.05351	0.841289
1367531_at	1.02403	0.884865	-1.01821	0.921827	-1.06223	0.66249
1367532_at	1.00927	0.962978	-1.01611	0.93653	-1.0763	0.611473
1367533_at	1.06371	0.776846	-1.03516	0.893497	1.04503	0.849939
1367534_at	-1.04843	0.909801	-1.14413	0.721197	-1.24305	0.476858
1367535_at	1.03771	0.881143	1.02431	0.931512	-1.03228	0.899598
1367536_at	1.08445	0.780366	1.1616	0.583363	1.16212	0.549193
1367537_at	-1.06749	0.597228	-1.08231	0.531243	-1.12096	0.247885
1367538_at	-1.05374	0.800582	-1.15645	0.400369	-1.08837	0.648867
1367539_at	-1.00713	0.981738	-1.09246	0.708908	-1.0491	0.847803
1367540_at	1.04606	0.895495	1.0531	0.884865	1.10656	0.734571
1367541_at	-1.01716	0.952847	-1.01298	0.967742	1.09642	0.685418
1367542_at	1.04883	0.814781	-1.05955	0.785072	1.02142	0.926616
1367543_at	1.04184	0.913192	1.10651	0.771908	-1.0449	0.905939
1367544_at	-1.08274	0.672445	-1.07329	0.734496	1.00492	0.985773
1367545_at	1.07198	0.787382	-1.14816	0.560812	-1.0244	0.9357
1367546_at	1.0286	0.91417	1.06678	0.794544	1.0552	0.820835
1367547_at	-1.01502	0.961394	-1.17102	0.482228	-1.01684	0.955603
1367548_at	1.06489	0.803285	-1.01229	0.970187	1.01661	0.955409
1367549_a_at	1.12049	0.689394	1.07933	0.817213	1.08816	0.779245
1367550_a_at	1.00794	0.963366	1.05756	0.69263	1.05276	0.70069
1367551_a_at	-1.05087	0.682887	1.0253	0.867915	-1.00195	0.991763
1367552_at	-1.02014	0.933268	1.0511	0.824806	1.11137	0.551409
1367553_x_at	-1.00615	0.985115	-1.02932	0.920981	-1.07589	0.753593
1367554_at	1.04476	0.817875	1.06546	0.741399	1.05858	0.75383
1367555_at	1.00723	0.794356	1.00528	0.866988	1.00224	0.944413
1367556_s_at	1.00822	0.887337	1.01584	0.77842	-1.00609	0.919795
1367557_s_at	-1.05255	0.923011	-1.09383	0.865796	-1.01182	0.985255
1367558_x_at	-1.09097	0.625264	-1.00701	0.979315	-1.06735	0.733017
1367559_at	1.02179	0.913755	1.08687	0.617472	1.12365	0.400369
1367560_at	-1.03561	0.847319	-1.05779	0.750421	-1.05349	0.753689
1367561_at	-1.00188	0.99131	-1.03003	0.821094	-1.01356	0.921827
1367562_at	-1.27654	0.592086	-1.23507	0.677295	-1.32613	0.513283
1367563_at	-1.5041	0.661966	-1.22725	0.859656	-1.89842	0.433053
1367564_at	-1.00279	0.994674	-1.0195	0.955493	-1.04527	0.881746
1367565_a_at	-1.01773	0.880364	-1.02335	0.849241	-1.05166	0.593262
1367566_at	-1.06015	0.881586	-1.08863	0.830466	-1.05809	0.885194
1367567_at	1.0109	0.957704	-1.02165	0.917924	1.00719	0.973401
1367568_a_at	-1.74162	0.742467	-2.51683	0.566102	-2.12327	0.626769
1367569_at	-1.02989	0.935216	-1.02977	0.939213	-1.09542	0.766492
1367570_at	-1.83895	0.757261	1.0296	0.992645	-1.35195	0.892
1367571_a_at	-1.05183	0.807854	-1.09238	0.657023	-1.16803	0.300938
1367572_at	-2.39418	0.575415	-1.66623	0.786787	-1.29076	0.896734
1367573_at	-1.02017	0.908722	-1.02039	0.913755	-1.01202	0.947428
1367574_at	-1.25773	0.598165	-1.2391	0.652519	-1.26788	0.579385
1367575_at	-1.00953	0.987999	-1.10442	0.848995	-1.16906	0.722033
1367576_at	-1.01569	0.949714	-1.05085	0.830445	-1.12008	0.526006
1367577_at	-2.62342	0.577068	-1.74988	0.789256	-1.30804	0.903116
1367578_at	-1.04519	0.951656	-1.13665	0.85606	-1.15018	0.826719
1367579_a_at	-1.02575	0.94649	-1.06478	0.866318	-1.04059	0.913755
1367580_at	-1.02034	0.946014	-1.00648	0.985956	-1.01088	0.972396
1367581_a_at	1.13562	0.930294	-1.2681	0.86912	-1.25826	0.865318
1367582_at	-1.03656	0.865859	-1.06365	0.764472	-1.0555	0.782651
1367583_at	-1.00234	0.974443	1.01869	0.762867	1.00664	0.921279
1367584_at	-1.25919	0.764328	1.04898	0.962439	-1.16211	0.856872
1367585_a_at	1.03762	0.97486	-1.23106	0.843774	-1.12793	0.909036
1367586_at	1.05268	0.860285	1.08665	0.770989	1.16886	0.487308
1367587_at	1.06344	0.75192	1.20274	0.217921	1.11007	0.538138
1367588_a_at	-1.04281	0.865937	1.0154	0.958174	1.01675	0.950875
1367589_at	-1.12358	0.791839	-1.12531	0.802691	-1.12118	0.795926
1367590_at	1.02019	0.948303	1.05346	0.862951	1.11308	0.654787
1367591_at	-1.07718	0.750715	-1.01919	0.949369	1.08074	0.737009
1367592_at	-1.90491	0.661937	1.13124	0.950751	-1.43836	0.824692
1367593_at	-1.04193	0.928374	-1.13735	0.75351	1.00173	0.99746
1367594_at	-1.11723	0.787177	-1.20169	0.640745	-1.13835	0.744754
1367595_s_at	1.0713	0.724324	1.16543	0.356995	1.01789	0.9402
1367596_at	1.00075	0.997132	-1.01686	0.923801	-1.00021	0.999285
1367597_at	-1.04636	0.858908	-1.02633	0.929135	-1.05516	0.825845
1367598_at	-1.01114	0.899077	1.02795	0.733571	-1.0693	0.224736
1367599_at	1.04723	0.922645	-1.02182	0.96802	1.07288	0.875307
1367600_at	-2.56897	0.518584	-1.47133	0.840911	-1.43236	0.842403
1367601_at	-1.08012	0.935352	-1.26551	0.786312	-1.4621	0.598258
1367602_at	-1.04117	0.947609	-1.27857	0.62277	-1.24938	0.63711
1367603_at	-1.06673	0.83811	-1.00851	0.984538	1.11691	0.695488
1367604_at	1.00373	0.995701	-1.18799	0.689857	-1.07052	0.884978
1367605_at	-1.02545	0.967622	-1.02188	0.974443	-1.10434	0.854921
1367606_at	-1.01776	0.9158	-1.00894	0.962978	-1.03215	0.836906
1367607_at	-1.01521	0.932775	-1.03033	0.866882	-1.04065	0.799039
1367608_at	1.08875	0.660443	1.07343	0.744754	1.09761	0.62088
1367609_at	1.02266	0.963188	1.10815	0.812262	1.46512	0.155574
1367610_at	-1.01228	0.947803	-1.00925	0.964237	-1.03902	0.812544
1367611_at	1.05258	0.868072	1.03562	0.919653	1.0567	0.856776
1367612_at	-1.00319	0.985398	1.01215	0.938919	1.03532	0.784786
1367613_at	1.06439	0.627462	1.1129	0.365311	1.21127	0.0372584
1367614_at	-1.21268	0.71635	-1.2527	0.681433	-1.3818	0.482526
1367615_at	1.05627	0.788862	1.19079	0.267503	1.04522	0.835271
1367616_at	1.05676	0.807809	1.15851	0.449297	1.1328	0.502684
1367617_at	-1.36751	0.626025	-1.3458	0.67156	-1.18709	0.812414
1367618_a_at	-1.04868	0.830795	-1.06115	0.796583	-1.05411	0.808938
1367619_at	1.04331	0.869416	1.16357	0.469958	1.3612	0.0436502
1367620_at	-1.01667	0.941308	-1.00699	0.979049	-1.03489	0.86944
1367621_at	1.12561	0.726464	1.03112	0.944395	1.03589	0.930993
1367622_at	-1.02803	0.913192	1.00483	0.988412	-1.03685	0.881586
1367623_at	1.01296	0.957698	-1.0326	0.89396	-1.07565	0.70436
1367624_at	-1.03604	0.935204	-1.01339	0.979184	-1.01611	0.972233
1367625_at	-1.00358	0.985384	-1.02835	0.864082	-1.06577	0.614591
1367626_at	-5.28958	0.497087	-1.57712	0.895112	-1.20186	0.957928
1367627_at	-1.23701	0.885444	-1.6802	0.704313	-1.58696	0.722662
1367628_at	-1.91341	0.586261	-1.64401	0.715911	-1.66238	0.684847
1367629_at	-1.02272	0.912298	-1.07014	0.70905	-1.04287	0.819851
1367630_at	-1.02884	0.906055	-1.05317	0.82492	1.00291	0.992657
1367631_at	-1.19981	0.871283	-1.26687	0.838215	-1.12115	0.924238
1367632_at	1.08008	0.792292	-1.04628	0.895112	1.00078	0.998323
1367633_at	1.15701	0.674044	-1.09837	0.817089	1.18579	0.606928
1367634_at	-1.00733	0.963846	-1.02646	0.864116	-1.01022	0.948037
1367635_at	1.02541	0.903257	1.08372	0.653626	1.13321	0.384027
1367636_at	-1.07484	0.796529	-1.01991	0.95507	-1.06838	0.814316
1367637_a_at	-1.05472	0.895855	-1.07061	0.871706	-1.1054	0.784075
1367638_at	1.07703	0.862226	1.03981	0.936447	1.04428	0.924699
1367639_a_at	-1.03652	0.907567	-1.03676	0.913167	-1.0897	0.746974
1367640_at	-1.01078	0.953613	-1.01847	0.924048	-1.01431	0.93731
1367641_at	1.00761	0.973973	1.03985	0.853607	1.10007	0.551672
1367642_at	1.05065	0.763324	1.04242	0.817819	1.04565	0.78841
1367643_at	1.07936	0.71418	-1.01415	0.960113	1.14723	0.438429
1367644_at	1.01085	0.97728	-1.21839	0.438789	-1.26739	0.26102
1367645_at	-1.02754	0.914359	-1.04856	0.851473	-1.08863	0.680963
1367646_at	-1.02463	0.930539	-1.06005	0.824423	-1.08033	0.740482
1367647_at	-1.00329	0.970649	1.00041	0.997132	-1.03989	0.527693
1367648_at	1.05386	0.880364	-1.11977	0.729449	-1.45505	0.0676789
1367649_at	1.09802	0.789356	-1.11054	0.776634	-1.02754	0.947133
1367650_at	-1.00479	0.995487	-1.09698	0.881745	-1.00517	0.995059
1367651_at	1.00443	0.99113	-1.16886	0.530426	-1.15606	0.535814
1367652_at	-1.17683	0.762867	-1.35462	0.541793	-1.60917	0.207205
1367653_a_at	1.00036	0.999335	-1.05235	0.883162	-1.04469	0.895777
1367654_at	-1.0363	0.963712	-1.08976	0.91171	-1.11809	0.872938
1367655_at	-1.16004	0.850539	-1.04191	0.965882	-1.11831	0.890603
1367656_at	-1.023	0.942788	1.02608	0.938952	1.09575	0.725024
1367657_at	-1.07925	0.795771	-1.09873	0.756169	-1.2113	0.406196
1367658_at	-1.00075	0.998431	-1.06933	0.848257	-1.03665	0.918259
1367659_s_at	-1.08847	0.824806	-1.04461	0.924261	1.2785	0.40473
1367660_at	-2.79454	0.601043	-2.74366	0.633099	-2.19678	0.705477
1367661_at	-1.35383	0.770545	1.02163	0.989027	-1.54322	0.64741
1367662_at	-1.01681	0.949037	-1.08456	0.718374	-1.10772	0.603476
1367663_at	1.02875	0.897246	1.07102	0.735368	1.14923	0.357448
1367664_at	-1.09353	0.823657	-1.17147	0.680963	-1.06093	0.890456
1367665_at	1.00758	0.989318	-1.02846	0.955816	1.13461	0.746355
1367666_at	-1.0659	0.756239	-1.08539	0.69598	-1.10698	0.580299
1367667_at	-1.00334	0.996381	1.14101	0.800445	-1.01813	0.9771
1367668_a_at	-1.12291	0.862963	-1.21668	0.76346	-1.17558	0.796314
1367669_a_at	-1.01033	0.981395	-1.03927	0.925761	1.14004	0.670593
1367670_at	-1.0104	0.973577	-1.00701	0.984611	1.001	0.997669
1367671_at	-1.03758	0.94101	-1.01156	0.985388	-1.06547	0.894028
1367672_at	1.00278	0.99453	-1.08216	0.778797	1.14286	0.56366
1367673_at	-1.08716	0.902977	-1.08827	0.907935	1.29185	0.642581
1367674_at	-1.00944	0.968938	-1.00908	0.972	-1.05357	0.791953
1367675_at	1.0597	0.87429	1.06633	0.8685	1.09733	0.781822
1367676_at	-1.10868	0.861346	-1.15067	0.813139	-1.30484	0.579461
1367677_at	1.05687	0.779899	1.09019	0.656237	1.00161	0.995819
1367678_at	1.01868	0.913755	-1.04743	0.770759	1.07115	0.607736
1367679_at	1.30907	0.726271	1.68422	0.45578	-1.16814	0.855602
1367680_at	-1.00206	0.994754	-1.05607	0.808938	1.14896	0.399147
1367681_at	-1.01509	0.970649	-1.04379	0.914381	-1.06726	0.853732
1367682_at	-1.16634	0.902381	-1.38109	0.78572	-1.58057	0.653339
1367683_at	-1.03079	0.938499	1.09976	0.793001	1.26717	0.362447
1367684_at	1.08585	0.704289	1.11448	0.619933	1.08287	0.713983
1367685_at	-1.02041	0.945735	1.00066	0.998431	-1.03936	0.889116
1367686_at	1.03041	0.858888	1.12002	0.388596	1.19934	0.0728986
1367687_a_at	-1.04795	0.892756	-1.10668	0.756239	-1.29825	0.240635
1367688_at	1.06855	0.809764	1.11559	0.682212	1.16801	0.488746
1367689_a_at	-1.11564	0.892552	-1.58784	0.472076	1.03588	0.96872
1367690_at	-1.03646	0.9005	1.01916	0.952901	1.13862	0.559492
1367691_at	-1.09267	0.871877	1.38712	0.461428	1.31782	0.520569
1367692_at	1.06563	0.629121	1.09142	0.501579	1.07635	0.562977
1367693_at	-1.12465	0.620985	-1.10335	0.713085	-1.12386	0.620985
1367694_at	-1.01187	0.963894	-1.02978	0.909445	-1.11857	0.543379
1367695_at	1.08761	0.801464	-1.1494	0.666361	-1.00155	0.997341
1367696_at	1.02907	0.961174	1.13465	0.810301	1.14746	0.776146
1367697_at	1.07393	0.801018	-1.05691	0.862992	1.11634	0.668853
1367698_a_at	1.0078	0.963464	-1.05229	0.719057	-1.05886	0.653903
1367699_at	-1.01535	0.954327	-1.00526	0.987178	-1.02613	0.919562
1367700_at	-1.80087	0.47447	-1.40011	0.741847	-1.53489	0.627926
1367701_at	-1.05434	0.882124	-1.19322	0.56244	-1.13355	0.680558
1367702_at	-1.04332	0.871298	-1.1761	0.438789	-1.31681	0.0790135
1367703_at	1.16358	0.529814	1.11548	0.698961	1.06149	0.840423
1367704_at	1.02709	0.920601	1.00489	0.988892	-1.13514	0.523209
1367705_at	1.29737	0.666441	1.78196	0.247546	2.50163	0.0292831
1367706_at	-1.04576	0.875757	-1.06266	0.835858	1.03471	0.908422
1367707_at	-1.06562	0.926616	-1.09358	0.89909	-1.17316	0.789356
1367708_a_at	-1.01442	0.984985	1.02636	0.971217	-1.0436	0.947609
1367709_at	-1.11718	0.870683	-1.26781	0.708695	-1.44069	0.482526
1367710_at	1.05745	0.833201	1.14072	0.579987	1.14602	0.527693
1367711_at	1.0233	0.91506	1.04461	0.837308	1.12652	0.440703
1367712_at	-1.09545	0.931595	-1.24616	0.827104	1.05821	0.959191
1367713_at	1.00586	0.984621	1.04785	0.853607	1.09145	0.669683
1367714_at	-1.0965	0.834413	-1.15528	0.740712	1.05928	0.903187
1367715_at	1.09745	0.788687	1.15622	0.668772	1.35715	0.203137
1367716_at	-1.03814	0.890796	1.03737	0.900577	1.04972	0.854388
1367717_at	-1.07131	0.690588	-1.06714	0.732093	-1.16057	0.260066
1367718_at	1.03156	0.91171	-1.03518	0.907422	-1.05873	0.822449
1367719_at	-1.00664	0.971404	-1.01837	0.921764	-1.02202	0.896989
1367720_at	1.01579	0.971217	-1.06376	0.880952	-1.22409	0.495199
1367721_at	1.08366	0.770759	1.14334	0.610741	-1.02639	0.935744
1367722_at	1.00668	0.992657	1.09321	0.875029	-1.22126	0.656441
1367723_a_at	-1.01999	0.953879	-1.09844	0.754545	-1.05759	0.856045
1367724_a_at	1.0192	0.934074	1.0149	0.952587	1.07771	0.684061
1367725_at	1.12237	0.603642	-1.0513	0.860918	-1.00765	0.981504
1367726_at	-1.04697	0.914719	-1.10286	0.810582	-1.14088	0.713906
1367727_at	-1.03369	0.883453	-1.07544	0.734631	-1.08439	0.674607
1367728_at	1.12728	0.812262	-1.06586	0.91506	1.04214	0.943046
1367729_at	-1.18511	0.909374	1.43408	0.800682	1.01554	0.993777
1367730_at	1.03113	0.903647	1.118	0.600736	1.16392	0.39233
1367731_at	-1.11561	0.812262	-1.00229	0.997318	-1.24428	0.581927
1367732_at	1.01074	0.981687	1.10376	0.793367	1.14411	0.678837
1367733_at	-1.083	0.938534	-1.11916	0.916327	-1.13343	0.899077
1367734_at	-1.10988	0.851677	-1.26729	0.63711	-1.32185	0.528806
1367735_at	-1.00604	0.981842	1.01004	0.969745	-1.00342	0.990438
1367736_at	-1.00286	0.989291	1.00535	0.979341	1.03492	0.825132
1367737_at	1.03917	0.926512	1.00969	0.985398	-1.15656	0.659655
1367738_at	-1.00563	0.99113	-1.20393	0.566332	-1.36944	0.190588
1367739_at	-7.00571	0.496209	-1.83075	0.877996	-1.26105	0.954336
1367740_at	-1.0636	0.95156	1.13397	0.902923	-1.41616	0.659158
1367741_at	1.07797	0.901737	-1.0404	0.953883	-1.27179	0.62088
1367742_at	-1.52092	0.433854	-1.69339	0.310303	-1.30837	0.654099
1367743_at	-1.11608	0.761659	-1.0374	0.935632	1.13604	0.713983
1367744_at	-1.22693	0.735988	-1.48943	0.469588	-1.32965	0.609021
1367745_at	-1.01392	0.977146	1.05037	0.913305	-1.1303	0.734631
1367746_a_at	-1.00291	0.99259	-1.17115	0.350986	-1.11541	0.537058
1367747_at	1.02183	0.948802	-1.06837	0.834704	-1.00123	0.99746
1367748_at	-1.0686	0.86477	-1.14949	0.70007	-1.27285	0.395745
1367749_at	-2.14227	0.628882	-1.184	0.937854	-1.57449	0.796951
1367750_at	1.06511	0.810517	-1.05366	0.859772	1.09705	0.70436
1367751_at	1.0638	0.734631	1.01561	0.947539	1.04919	0.800794
1367752_at	1.10681	0.610741	1.15329	0.466356	1.1212	0.550051
1367753_at	-1.10847	0.746817	1.00844	0.985942	1.02538	0.947941
1367754_s_at	1.04761	0.939748	-1.02836	0.967622	-1.29999	0.568225
1367755_at	1.0266	0.959299	-1.11537	0.813495	-1.19528	0.644862
1367756_at	1.06299	0.844617	1.05047	0.884865	1.11462	0.693707
1367757_at	-1.01353	0.926512	-1.00064	0.997319	-1.03646	0.774852
1367758_at	1.01229	0.900374	1.02391	0.802215	-1.03988	0.616273
1367759_at	1.06513	0.867743	-1.14193	0.706037	-1.15791	0.643242
1367760_at	-1.04252	0.874909	1.05883	0.831935	1.06228	0.807265
1367761_at	-1.03543	0.925764	-1.12344	0.722596	-1.17498	0.564438
1367762_at	1.02984	0.932027	1.13038	0.677591	1.07029	0.824806
1367763_at	1.02351	0.931595	-1.01852	0.950118	-1.16961	0.397486
1367764_at	-1.34711	0.584924	-1.38355	0.5725	-1.28255	0.660443
1367765_at	1.03374	0.950091	-1.01326	0.983841	-1.15541	0.741296
1367766_at	-1.04196	0.88517	1.07754	0.789144	1.25235	0.219816
1367767_at	1.0788	0.807854	-1.11647	0.724591	-1.12325	0.682864
1367768_at	-1.18187	0.782021	-1.09934	0.89462	-1.19557	0.764351
1367769_at	-1.02551	0.92898	-1.02999	0.921177	-1.07246	0.77299
1367770_at	-1.03537	0.866471	-1.0241	0.918124	1.05322	0.786039
1367771_at	-1.03352	0.921279	-1.02403	0.947941	-1.21009	0.407435
1367772_at	1.00362	0.98968	-1.04997	0.822449	-1.05686	0.778973
1367773_at	1.15687	0.70872	1.14323	0.753065	1.19393	0.628873
1367774_at	1.0628	0.852342	1.23997	0.407289	1.26632	0.293387
1367775_at	1.05945	0.894028	-1.01785	0.972633	-1.05778	0.896989
1367776_at	1.03524	0.948474	-1.00277	0.99692	1.20366	0.656648
1367777_at	-1.04008	0.864116	-1.09471	0.66395	-1.18061	0.285243
1367778_at	1.02316	0.947255	-1.05827	0.867916	-1.01852	0.958542
1367779_at	-1.19499	0.728202	-1.17677	0.771603	-1.05842	0.926512
1367780_at	-1.00095	0.999253	-1.14112	0.839201	1.08091	0.90514
1367781_at	1.03641	0.897847	1.0752	0.786278	1.00621	0.985451
1367782_at	-5.09841	0.504584	-2.06683	0.817329	-1.28553	0.940555
1367783_at	1.02516	0.862822	-1.00485	0.978859	1.0311	0.822449
1367784_a_at	1.05448	0.83247	-1.03392	0.907969	1.17177	0.406196
1367785_at	-1.63932	0.81764	1.83331	0.786198	-1.29738	0.912949
1367786_at	1.19532	0.776861	1.22154	0.763324	-1.12977	0.856837
1367787_at	1.15875	0.684061	1.17133	0.679716	1.20451	0.584895
1367788_at	-1.02022	0.931355	-1.07102	0.740681	-1.09496	0.611634
1367789_at	-1.00883	0.971782	-1.09467	0.644862	-1.087	0.652997
1367790_at	1.00725	0.99113	-1.00531	0.994039	1.03983	0.940519
1367791_at	-1.06528	0.876455	1.0213	0.965386	-1.07391	0.859053
1367792_at	1.03787	0.895945	1.0001	0.999812	-1.04165	0.883162
1367793_at	1.12886	0.663828	1.20762	0.478882	1.49639	0.0372584
1367794_at	1.00744	0.987691	-1.05961	0.885017	-1.06396	0.868682
1367795_at	-1.03239	0.978716	1.38957	0.728454	-1.11086	0.921117
1367796_at	1.05624	0.907714	-1.00588	0.99296	-1.00137	0.997942
1367797_at	1.15704	0.626838	1.0018	0.997132	1.10235	0.768173
1367798_at	1.02111	0.92196	-1.03626	0.867916	-1.10468	0.527977
1367799_at	-1.14924	0.717738	1.01594	0.97728	-1.02917	0.95161
1367800_at	-1.12647	0.914359	-1.03839	0.977668	-1.3594	0.746716
1367801_at	1.04357	0.881619	-1.00265	0.995239	-1.024	0.938086
1367802_at	1.06691	0.920325	1.0342	0.963366	-1.16412	0.78859
1367803_at	-1.01624	0.931335	-1.01736	0.931077	-1.05771	0.714247
1367804_at	1.03354	0.899268	1.06544	0.802215	1.02775	0.918259
1367805_at	-1.09081	0.937291	-1.23822	0.841368	-1.50324	0.634079
1367806_at	-1.01435	0.977552	-1.01272	0.981842	-1.08847	0.836028
1367807_at	-1.04467	0.889297	-1.0709	0.827141	1.02032	0.952138
1367808_at	-1.08305	0.735996	-1.00952	0.977451	1.07206	0.774177
1367809_at	1.072	0.844564	1.06598	0.868072	1.05866	0.875029
1367810_at	-1.07549	0.960196	1.16958	0.914632	-1.22859	0.875397
1367811_at	1.09138	0.8763	-1.02306	0.973595	-1.1666	0.762474
1367812_at	1.00578	0.990031	-1.09711	0.792678	1.00259	0.995921
1367813_at	-1.10701	0.803824	-1.07942	0.869295	-1.38552	0.260066
1367814_at	-1.20825	0.922933	-1.34505	0.880541	-1.78814	0.720171
1367815_at	1.03041	0.958362	1.21256	0.685884	1.32348	0.481854
1367816_at	-1.38037	0.769135	-1.49363	0.721296	-1.5045	0.693154
1367817_at	-1.04878	0.914425	-1.13828	0.749675	-1.23421	0.527061
1367818_at	1.06661	0.837852	1.08501	0.800876	1.25321	0.308443
1367819_at	1.04378	0.825956	-1.03332	0.881306	-1.05099	0.794409
1367820_at	-1.0065	0.984461	-1.05323	0.851387	1.01646	0.9549
1367821_a_at	-1.03716	0.800376	-1.05741	0.693951	-1.0164	0.92024
1367822_at	-1.01881	0.940646	1.0104	0.970649	1.02943	0.904652
1367823_at	-1.02128	0.960451	-1.07338	0.860869	-1.11491	0.751396
1367824_at	1.02813	0.846195	-1.03862	0.792202	-1.00663	0.967945
1367825_at	1.03911	0.857899	1.00121	0.99692	-1.05441	0.791834
1367826_at	1.07646	0.877073	1.42301	0.309698	1.83571	0.0308556
1367827_at	-1.01727	0.956186	-1.03329	0.918159	1.00721	0.983857
1367828_at	-1.00429	0.990031	-1.02482	0.936029	1.0053	0.987634
1367829_at	1.03437	0.871283	-1.01128	0.964124	1.01695	0.940351
1367830_a_at	1.04581	0.867916	1.14389	0.558772	1.0875	0.725024
1367831_at	-1.02635	0.939096	1.05496	0.874598	1.03181	0.926512
1367832_at	1.01031	0.971738	1.08628	0.734039	1.20747	0.268177
1367833_at	1.04856	0.821957	1.19563	0.256642	1.31446	0.0372584
1367834_at	1.07746	0.86168	1.29845	0.45169	1.45482	0.161029
1367835_at	1.08199	0.788687	1.20981	0.455937	1.08063	0.792292
1367836_at	1.15063	0.853916	-1.13698	0.876176	1.02837	0.974913
1367837_at	1.0014	0.994674	1.08358	0.51229	1.16521	0.0836556
1367838_at	1.01288	0.972778	1.03227	0.931924	1.02596	0.942111
1367839_at	1.16706	0.778857	1.11051	0.86912	1.11587	0.852481
1367840_at	1.03872	0.843774	-1.02362	0.915306	1.04565	0.80903
1367841_a_at	-1.08366	0.448507	-1.01128	0.944413	-1.03485	0.790573
1367842_at	-1.01708	0.960084	-1.14176	0.62088	-1.22529	0.334592
1367843_at	1.09782	0.857812	1.1806	0.740681	1.46569	0.278304
1367844_at	-1.20378	0.737592	-1.09489	0.892701	-1.59592	0.249448
1367845_at	1.08173	0.970344	1.03218	0.990221	-1.13509	0.949942
1367846_at	-1.08774	0.861026	-1.39846	0.361624	-1.46987	0.217897
1367847_at	-1.06145	0.936286	-1.38793	0.585924	-1.65563	0.28082
1367848_at	1.00305	0.995921	-1.07853	0.866841	-1.01234	0.981019
1367849_at	1.06953	0.76984	-1.10518	0.657045	-1.09621	0.665652
1367850_at	1.06075	0.916306	-1.04209	0.946849	-1.3813	0.412625
1367851_at	-1.01935	0.954444	1.00416	0.992632	-1.06332	0.83559
1367852_s_at	-1.06198	0.945521	-1.16436	0.858256	-1.33775	0.673352
1367853_at	-1.16824	0.865859	1.0987	0.928456	-1.27918	0.770545
1367854_at	-1.07291	0.8522	-1.02068	0.96422	1.03548	0.93176
1367855_at	1.09985	0.833078	1.0082	0.990031	-1.05026	0.921371
1367856_at	-1.08659	0.802691	-1.14177	0.681499	-1.27842	0.308915
1367857_at	-1.06023	0.871217	-1.06634	0.866882	1.16278	0.610741
1367858_at	-1.2614	0.795943	-2.08594	0.29353	-2.46642	0.119232
1367859_at	-1.08849	0.893986	-1.30837	0.623373	-1.27788	0.633903
1367860_a_at	-1.34928	0.552053	-1.10884	0.877739	-1.82091	0.11503
1367861_at	-1.0073	0.992657	-1.14494	0.816696	-1.24405	0.65663
1367862_at	-1.30863	0.728202	-1.42984	0.644606	-1.12426	0.895353
1367863_at	-1.05868	0.822497	1.03914	0.895438	1.01221	0.967945
1367864_at	-1.94734	0.537058	-2.17349	0.484266	-1.60258	0.686208
1367865_at	1.01126	0.960997	-1.181	0.249677	-1.0239	0.912196
1367866_at	-1.10117	0.942359	-1.42076	0.770759	-1.10288	0.941125
1367867_at	1.1035	0.745682	1.12996	0.693951	1.24454	0.359913
1367868_at	1.02464	0.932375	1.12346	0.62366	1.17498	0.414586
1367869_at	-1.09101	0.789098	-1.20289	0.530594	-1.16585	0.590691
1367870_at	1.05417	0.770193	1.06175	0.750624	1.07495	0.665448
1367871_at	1.02151	0.95799	-1.12151	0.744754	-1.30873	0.275835
1367872_at	1.02906	0.931474	1.03515	0.921827	1.0415	0.898495
1367873_at	1.00942	0.970113	-1.04592	0.845296	-1.03861	0.863152
1367874_at	-1.4657	0.65663	-1.30321	0.79107	-1.3098	0.770848
1367875_at	1.01462	0.948637	1.04642	0.82957	1.0293	0.891054
1367876_at	-1.20071	0.545273	-1.15578	0.674777	-1.18387	0.582766
1367877_at	1.02431	0.978219	1.1835	0.819326	1.09989	0.899077
1367878_at	1.03327	0.902604	-1.00406	0.991185	1.01594	0.955284
1367879_at	1.04295	0.884618	1.02911	0.930518	1.09957	0.705813
1367880_at	-1.25238	0.803265	-1.36823	0.7329	-1.5095	0.602501
1367881_at	-1.01994	0.966253	-1.04335	0.928374	-1.08417	0.841093
1367882_at	-1.00092	0.99746	1.01185	0.966036	1.01289	0.960196
1367883_at	-1.04957	0.875642	1.00622	0.98822	-1.04321	0.893497
1367884_at	1.03015	0.938166	1.11399	0.753045	-1.00257	0.995921
1367885_at	1.09297	0.806256	1.03345	0.940646	-1.00283	0.995921
1367886_at	1.07691	0.71728	1.09151	0.678837	1.10275	0.6082
1367887_at	1.00543	0.987665	-1.04656	0.876316	-1.0908	0.717357
1367888_at	1.05785	0.852394	1.00109	0.997743	-1.02116	0.949714
1367889_at	1.032	0.934129	-1.23046	0.473249	-1.13726	0.67224
1367890_at	-1.06385	0.849185	-1.1289	0.688827	-1.21382	0.430252
1367891_a_at	1.08119	0.874909	1.15137	0.770315	1.01638	0.978162
1367892_at	-1.14523	0.604205	-1.23852	0.382824	-1.3704	0.0981692
1367893_a_at	1.07968	0.752797	1.08606	0.749197	1.05603	0.833038
1367894_at	1.28528	0.746513	1.38979	0.674777	1.24398	0.783426
1367895_at	-1.00388	0.988594	-1.02279	0.925764	-1.00844	0.972131
1367896_at	-2.03638	0.758475	-2.5737	0.684185	-1.90318	0.784075
1367897_at	-1.01109	0.976508	-1.00495	0.991272	1.0912	0.763324
1367898_at	-1.07253	0.87908	-1.18258	0.690214	-1.05657	0.907988
1367899_at	-1.05415	0.928838	-1.04879	0.940235	-1.0354	0.954327
1367900_at	-1.40082	0.470794	-1.51872	0.371139	-1.31729	0.575415
1367901_at	1.01843	0.955579	-1.03351	0.922603	-1.14542	0.575415
1367902_at	-1.08484	0.680963	-1.10205	0.633458	-1.20355	0.210107
1367903_at	1.09108	0.796954	1.03363	0.936447	1.29763	0.288494
1367904_at	1.30748	0.626427	1.23708	0.735186	1.17094	0.798142
1367905_at	1.22322	0.782644	1.39181	0.638323	1.25456	0.750072
1367906_at	1.17868	0.660907	1.30568	0.453596	1.60512	0.0713541
1367907_a_at	1.02589	0.965386	1.21658	0.681433	1.39479	0.3758
1367908_at	1.02757	0.881586	1.04965	0.786262	1.08436	0.581927
1367909_at	1.09785	0.709024	-1.01315	0.969867	1.03942	0.894498
1367910_at	1.05236	0.871298	-1.00754	0.985906	1.00888	0.981693
1367911_at	-1.12309	0.802691	-1.12539	0.81153	-1.10851	0.827141
1367912_at	-1.16547	0.791839	-1.29693	0.638728	-1.19022	0.757303
1367913_at	-1.04384	0.93647	-1.18972	0.711652	-1.2263	0.623721
1367914_at	-1.06741	0.837556	-1.13791	0.663828	-1.15964	0.576499
1367915_at	1.10111	0.789204	1.26757	0.449212	1.20369	0.547264
1367916_at	-1.16405	0.726464	1.05717	0.918885	-1.12842	0.789098
1367917_at	1.04236	0.864082	1.09717	0.674777	1.04217	0.864377
1367918_at	1.07042	0.879151	1.11394	0.808263	1.08839	0.846697
1367919_at	1.00244	0.996427	-1.00975	0.985276	1.01045	0.982522
1367920_at	1.07188	0.843753	-1.00192	0.997132	1.05449	0.882726
1367921_at	-1.02618	0.865266	-1.08383	0.527693	-1.12535	0.234943
1367922_at	-1.00301	0.994319	-1.06783	0.833663	1.01191	0.973022
1367923_at	1.02319	0.966899	1.06858	0.90273	1.1094	0.823516
1367924_at	-1.04115	0.843774	-1.00282	0.992645	-1.12649	0.451013
1367925_at	1.09236	0.861182	1.01982	0.974921	1.01154	0.985541
1367926_at	1.15107	0.47958	1.05173	0.852394	1.05442	0.829597
1367927_at	1.11024	0.802831	1.10636	0.823298	1.05757	0.904067
1367928_at	-1.30531	0.686116	-1.20422	0.807613	-1.11223	0.891054
1367929_at	-1.17979	0.553159	-1.26575	0.379167	-1.15783	0.608691
1367930_at	-1.42084	0.812377	1.46174	0.80928	-1.05041	0.97903
1367931_a_at	1.05163	0.936698	-1.00736	0.993219	1.00444	0.995814
1367932_at	1.02236	0.962896	1.1214	0.780104	1.01594	0.973863
1367933_at	-1.01025	0.983781	-1.0703	0.874345	1.08905	0.823213
1367934_at	-1.07114	0.686208	-1.058	0.769457	-1.11484	0.468371
1367935_at	1.02517	0.906162	1.00492	0.985538	1.03408	0.868769
1367936_at	1.08838	0.795765	1.09946	0.781855	-1.05207	0.884923
1367937_at	1.03768	0.971622	-1.30962	0.762268	-1.42873	0.642145
1367938_at	1.11351	0.749282	1.12688	0.735368	1.62179	0.0292831
1367939_at	-1.01029	0.980567	-1.12305	0.725024	-1.3557	0.162789
1367940_at	-1.09577	0.935632	-1.45877	0.698291	-1.175	0.878579
1367941_at	1.03856	0.781431	1.02824	0.858256	1.13498	0.168157
1367942_at	1.01653	0.977482	-1.08176	0.880657	-1.03286	0.951554
1367943_at	-1.00708	0.984131	1.03247	0.919553	1.13401	0.581927
1367944_at	1.00777	0.978219	-1.0173	0.949901	1.06443	0.77299
1367945_at	1.00749	0.979059	-1.05685	0.818544	-1.17551	0.328097
1367946_at	-1.00758	0.988432	1.28495	0.439435	1.29525	0.372738
1367947_at	1.00803	0.976983	-1.02075	0.938483	-1.05335	0.811822
1367948_a_at	1.01937	0.96872	-1.01312	0.981397	-1.08328	0.850098
1367949_at	-1.63278	0.647058	-1.27949	0.853607	-1.33008	0.81068
1367950_at	1.06487	0.947133	-1.04778	0.964266	-1.02561	0.981019
1367951_at	-2.3747	0.588677	-1.90321	0.72776	-1.09342	0.967742
1367952_at	1.02897	0.994576	-1.53409	0.895194	-1.41877	0.910224
1367953_at	-1.04045	0.929511	-1.04991	0.917306	-1.04759	0.915494
1367954_at	1.11206	0.807854	1.01745	0.97633	-1.05376	0.914078
1367955_at	-1.0006	0.998952	-1.05703	0.879185	1.04084	0.910378
1367956_at	-1.05071	0.871826	-1.06336	0.848389	-1.14371	0.59008
1367957_at	1.01543	0.967042	-1.02982	0.937484	-1.02943	0.934278
1367958_at	-1.08071	0.825078	-1.01402	0.975988	-1.16318	0.62088
1367959_a_at	-1.07677	0.843819	-1.02394	0.957994	-1.13479	0.705813
1367960_at	-1.08596	0.91461	-1.17881	0.824359	-1.14245	0.854329
1367961_at	-1.06121	0.966322	-1.44013	0.763831	-1.23497	0.865806
1367962_at	-1.49224	0.770721	-1.3987	0.823814	-1.0358	0.985276
1367963_at	1.03953	0.865571	-1.02053	0.937995	1.07085	0.737961
1367964_at	-4.83819	0.511759	-1.50447	0.904311	-1.21097	0.954479
1367965_at	1.02352	0.908392	-1.00237	0.993408	-1.0334	0.865276
1367966_at	-1.0392	0.860918	-1.08821	0.673381	-1.13674	0.437207
1367967_at	1.04124	0.874909	1.08982	0.721276	1.136	0.526523
1367968_at	1.06196	0.763324	1.03523	0.881994	1.06496	0.749011
1367969_at	1.03574	0.906162	-1.01184	0.973485	1.0467	0.874021
1367970_at	-1.26419	0.826953	-1.39481	0.759758	-1.33553	0.778897
1367971_at	-1.11447	0.76965	-1.0468	0.919454	-1.27619	0.408642
1367972_at	1.00626	0.979501	1.02176	0.926616	1.12354	0.454036
1367973_at	-1.02658	0.978859	1.33165	0.713114	1.66241	0.403482
1367974_at	1.08256	0.889002	1.02799	0.967323	1.02319	0.971208
1367975_at	1.15001	0.825898	1.1308	0.862495	1.14065	0.838914
1367976_at	-1.00827	0.978894	-1.04089	0.886979	1.03632	0.894491
1367977_at	-1.19944	0.854064	-1.2742	0.808374	-1.19785	0.854952
1367978_at	-1.19538	0.627359	-1.09322	0.847644	-1.00986	0.985942
1367979_s_at	-1.03219	0.957563	1.13698	0.812262	-1.1117	0.84087
1367980_at	-1.00197	0.994457	-1.05244	0.800569	1.04261	0.82957
1367981_at	1.07422	0.802691	-1.05042	0.880782	1.12488	0.64567
1367982_at	1.0639	0.926981	1.75918	0.193227	2.84813	0.00826668
1367983_at	1.02547	0.949037	1.09627	0.799009	1.05508	0.88251
1367984_at	-1.07999	0.829754	-1.08877	0.822142	-1.00667	0.989027
1367985_at	-1.09721	0.926512	-1.24689	0.814991	-1.27938	0.775218
1367986_at	-1.19553	0.626025	-1.04977	0.92196	-1.19886	0.616904
1367987_at	-1.00394	0.993219	-1.0309	0.937165	1.04013	0.911423
1367988_at	1.02375	0.900577	1.02521	0.901142	-1.02408	0.898465
1367989_at	-1.82997	0.493897	-1.59999	0.642469	-1.38853	0.748286
1367990_at	1.01774	0.962096	-1.038	0.919084	1.15971	0.575415
1367991_at	1.0849	0.768347	1.03339	0.92372	1.06417	0.82906
1367992_at	-1.05273	0.905157	1.06508	0.888371	-1.09957	0.808122
1367993_at	-1.09257	0.8215	1.0064	0.99134	1.06521	0.878961
1367994_at	1.1259	0.803667	-1.0857	0.880364	1.06198	0.909477
1367995_at	-1.03164	0.863791	1.03662	0.850145	1.04515	0.794356
1367996_a_at	-1.05129	0.925686	-1.0334	0.955135	-1.04238	0.938166
1367997_at	-1.04715	0.873129	-1.04981	0.874331	1.02433	0.937925
1367998_at	-1.13456	0.898495	-1.18282	0.870372	1.04003	0.971217
1367999_at	1.07678	0.776626	-1.1001	0.718952	-1.07889	0.769457
1368000_at	-1.00089	0.995701	1.00525	0.969668	1.01211	0.919801
1368001_at	-1.14959	0.840911	1.05594	0.947179	-1.11105	0.882469
1368002_at	1.05572	0.850539	1.17593	0.499032	1.14838	0.551488
1368003_at	-1.15436	0.929896	-1.51237	0.781355	-1.35898	0.834124
1368004_at	1.03069	0.921827	-1.03572	0.913755	-1.10247	0.699946
1368005_at	-1.00085	0.999335	1.1561	0.85271	-1.00985	0.992482
1368006_at	-1.00342	0.995701	-1.12368	0.781277	-1.16225	0.682514
1368007_at	1.00164	0.998966	1.84128	0.422393	1.34171	0.732093
1368008_at	-1.18886	0.811894	-1.30286	0.714068	-1.50139	0.494821
1368009_at	-1.32334	0.616787	-1.35432	0.607736	-1.50079	0.412631
1368010_at	-1.01952	0.96638	-1.08775	0.843053	-1.09522	0.812621
1368011_at	1.05527	0.89259	-1.04492	0.920065	-1.00618	0.990366
1368012_at	-1.05365	0.825504	-1.11291	0.626685	-1.07424	0.749527
1368013_at	-1.7156	0.652823	-1.51238	0.763324	-1.311	0.844617
1368014_at	1.00861	0.995059	-1.2215	0.842403	-1.28276	0.779424
1368015_at	1.07288	0.88207	1.04297	0.937865	-1.05619	0.911735
1368016_at	1.0745	0.785352	1.18122	0.471752	1.40204	0.0445231
1368017_at	-1.64399	0.717965	-1.50761	0.789356	-1.06233	0.973191
1368018_at	1.0234	0.926981	-1.04706	0.853607	1.02311	0.92785
1368019_at	-1.03905	0.823657	1.01086	0.960014	1.02004	0.916545
1368020_at	1.04785	0.915715	1.1671	0.690165	1.03056	0.947539
1368021_at	-1.02334	0.865065	-1.07003	0.559614	-1.07928	0.455937
1368022_at	-1.13865	0.764653	-1.1434	0.772699	-1.23797	0.579122
1368023_at	1.01586	0.988062	-1.73873	0.387095	-2.17196	0.120557
1368024_at	1.09728	0.897246	-1.60114	0.384027	-1.94067	0.11503
1368025_at	-1.08475	0.954293	1.20334	0.895453	1.0831	0.9549
1368026_at	-1.02369	0.931077	-1.03904	0.888358	1.03667	0.888206
1368027_at	1.07078	0.871298	-1.08546	0.853439	-1.03281	0.943557
1368028_at	-1.0131	0.98822	1.27575	0.70385	1.04388	0.954515
1368029_at	1.02348	0.917391	-1.0649	0.760764	1.05636	0.77895
1368030_at	1.11843	0.830312	-1.05398	0.9325	1.21751	0.673349
1368031_at	1.01255	0.978716	1.08746	0.83539	1.08519	0.826879
1368032_at	1.01044	0.987267	1.15757	0.770159	1.18833	0.699297
1368033_at	1.03956	0.923969	1.00815	0.987514	1.04952	0.902604
1368034_at	1.09263	0.937116	1.83518	0.477229	1.0335	0.978868
1368035_a_at	1.02769	0.914274	-1.00697	0.982522	1.02517	0.92326
1368036_at	-1.01386	0.956745	-1.04621	0.852481	-1.05277	0.813234
1368037_at	-1.03983	0.947406	1.04492	0.944537	1.05957	0.920117
1368038_at	-1.05229	0.897002	-1.41479	0.183328	-1.21235	0.520683
1368039_at	1.05384	0.897484	-1.11656	0.776626	1.02317	0.958174
1368040_at	1.03898	0.877582	-1.01729	0.952114	1.02169	0.935705
1368041_at	1.14444	0.62088	1.22664	0.435511	1.33994	0.14707
1368042_a_at	-1.10412	0.789098	-1.16126	0.681238	-1.28915	0.375406
1368043_at	-1.01187	0.974893	-1.02418	0.94926	-1.0088	0.982482
1368044_at	1.01914	0.988734	1.87738	0.45578	-1.02324	0.986019
1368045_at	1.09244	0.701394	1.21857	0.30573	1.30046	0.0981692
1368046_at	1.20278	0.711662	1.06679	0.918739	1.42631	0.386072
1368047_at	-1.02062	0.976101	-1.29406	0.612329	-1.17381	0.761235
1368048_at	-1.09548	0.871298	1.00292	0.997132	-1.13306	0.813621
1368049_at	1.06173	0.712668	1.05071	0.784867	1.12159	0.391343
1368050_at	-1.0126	0.957351	-1.10017	0.609407	-1.09688	0.594342
1368051_at	1.05816	0.871172	1.22876	0.46694	1.27726	0.300938
1368052_at	-1.12352	0.935216	1.05829	0.971871	-1.6479	0.657262
1368053_at	-1.04937	0.888705	-1.12626	0.70709	-1.24495	0.365085
1368054_at	-1.0514	0.929484	-1.03362	0.957552	1.02314	0.969796
1368055_a_at	-1.09394	0.856872	-1.11861	0.825485	1.03597	0.94842
1368056_at	-1.00267	0.995921	-1.0667	0.867715	-1.05638	0.88112
1368057_at	1.02526	0.919985	1.05303	0.82854	1.05494	0.808202
1368058_at	-1.01399	0.963306	1.00305	0.993862	-1.09719	0.688938
1368059_at	-1.17937	0.924842	-1.9605	0.643368	-1.99597	0.605527
1368060_at	1.00078	0.998431	-1.07405	0.829272	-1.00046	0.999285
1368061_at	1.06297	0.82296	1.15851	0.543782	1.05601	0.847195
1368062_at	1.05077	0.850633	1.10536	0.680685	1.2399	0.208788
1368063_a_at	1.01432	0.928545	-1.1019	0.402491	-1.02257	0.881155
1368064_a_at	1.29191	0.707622	1.86794	0.258437	2.52905	0.0436502
1368065_at	1.01641	0.973595	-1.09093	0.84409	-1.03112	0.946849
1368066_at	1.03943	0.908064	1.17065	0.567761	1.05125	0.876847
1368067_at	-1.01136	0.965735	-1.12125	0.567453	-1.04398	0.851441
1368068_a_at	1.05099	0.874456	1.05045	0.882726	1.20098	0.433854
1368069_at	1.06432	0.577282	1.01597	0.918024	1.07986	0.459998
1368070_at	-1.00141	0.996429	1.05256	0.826698	-1.05787	0.793347
1368071_at	1.02533	0.910538	-1.07199	0.731416	-1.01009	0.966655
1368072_at	-1.18004	0.769457	-1.06968	0.922836	-1.09795	0.879832
1368073_at	1.07466	0.874021	1.15149	0.744754	1.01809	0.972131
1368074_at	1.15802	0.769527	1.27517	0.611044	1.1395	0.796951
1368075_at	1.16044	0.607597	1.25883	0.401125	1.24764	0.37961
1368076_at	-1.00271	0.995701	-1.01909	0.962985	-1.04924	0.889089
1368077_at	-1.00762	0.973518	-1.00222	0.993893	-1.11588	0.466081
1368078_at	-1.12037	0.88391	-1.39345	0.626685	-1.12932	0.87546
1368079_at	1.09383	0.83249	1.08987	0.852394	1.41923	0.219816
1368080_at	-1.17699	0.863096	-1.45581	0.660443	-1.5605	0.555173
1368081_at	1.00026	0.999751	-1.19207	0.750453	-1.09894	0.869457
1368082_at	-1.03599	0.946318	-1.15173	0.763872	-1.19523	0.665652
1368083_at	1.0405	0.881155	1.04455	0.876879	1.11387	0.62088
1368084_at	1.01829	0.990564	-1.17306	0.900663	-1.11742	0.928838
1368085_at	1.01722	0.965386	-1.15945	0.63304	-1.28022	0.298399
1368086_a_at	1.13777	0.613657	1.15862	0.581519	1.14801	0.581495
1368087_a_at	-1.01567	0.965817	-1.15435	0.611473	1.09843	0.745682
1368088_at	-1.02168	0.927581	1.03174	0.897402	1.0234	0.92155
1368089_at	1.07947	0.819818	1.0714	0.852717	-1.00335	0.994674
1368090_at	1.03045	0.858893	1.01525	0.937911	-1.02805	0.870683
1368091_at	-1.0631	0.921844	-1.23174	0.702866	-1.11447	0.851859
1368092_at	1.00851	0.978978	-1.01595	0.960997	-1.03639	0.897484
1368093_at	-1.101	0.8155	1.11161	0.808202	-1.06147	0.893976
1368094_at	-1.00425	0.989041	-1.04492	0.862951	-1.13921	0.474962
1368095_at	-1.05213	0.791834	-1.08349	0.668992	-1.02869	0.893908
1368096_at	1.02777	0.956916	-1.08612	0.866517	-1.25578	0.530685
1368097_a_at	-1.06332	0.93653	-1.03935	0.96422	-1.35249	0.61061
1368098_a_at	1.011	0.976469	-1.0649	0.849185	1.01307	0.970943
1368099_at	-1.08035	0.688568	-1.17066	0.345811	-1.16572	0.311091
1368100_at	1.05296	0.840911	1.00632	0.985825	-1.0263	0.926512
1368101_at	1.02655	0.950751	1.03111	0.946014	1.02131	0.961854
1368102_at	1.03111	0.98968	-1.58594	0.799101	-1.31341	0.881586
1368103_at	1.00837	0.991044	-1.13469	0.821318	-1.03296	0.957605
1368104_at	-1.38643	0.415266	-1.25017	0.642581	-1.47808	0.28169
1368105_at	-1.31105	0.484266	-1.35802	0.449324	-1.42605	0.296658
1368106_at	1.01455	0.966943	1.06384	0.848632	-1.01452	0.967042
1368107_at	1.03066	0.930575	1.16053	0.596669	1.15357	0.586257
1368108_at	-2.3002	0.560509	-1.52228	0.812264	-1.21735	0.91548
1368109_at	-1.05307	0.918323	-1.26889	0.563998	-1.33226	0.41911
1368110_a_at	-1.06589	0.789976	1.1203	0.616904	-1.07874	0.744305
1368111_at	1.07022	0.804122	1.01915	0.955579	-1.02604	0.934799
1368112_at	1.13357	0.691079	1.07344	0.852717	1.01233	0.977433
1368113_at	-1.0927	0.946311	1.70959	0.615475	-1.14703	0.91395
1368114_at	-1.87926	0.741296	-1.26586	0.921827	-1.78477	0.764417
1368115_at	1.09917	0.862459	1.21505	0.70069	1.27939	0.576268
1368116_a_at	-1.01971	0.938483	-1.02039	0.940457	1.12875	0.506244
1368117_at	1.05344	0.810979	1.10212	0.635465	1.22284	0.162789
1368118_at	1.08387	0.784075	-1.04313	0.904519	-1.06256	0.845682
1368119_at	1.08606	0.791729	1.12615	0.702982	1.08614	0.790624
1368120_at	-1.01559	0.973485	1.13197	0.747682	1.07575	0.854227
1368121_at	1.20511	0.849857	1.97436	0.375545	1.73468	0.468227
1368122_at	1.12912	0.616904	1.03874	0.906602	1.23013	0.296658
1368123_at	-1.03918	0.943631	-1.02364	0.969356	-1.18312	0.70069
1368124_at	1.08681	0.864082	-1.08275	0.878636	-1.19282	0.671126
1368125_at	1.03194	0.908872	-1.0419	0.884271	-1.00507	0.987916
1368126_at	1.04943	0.897441	1.0145	0.974443	1.01104	0.979688
1368127_at	1.0651	0.936535	-1.04526	0.959953	-1.01573	0.986614
1368128_at	1.0131	0.986281	-1.05786	0.934984	-1.1717	0.774442
1368129_at	1.06058	0.871956	1.02702	0.949596	1.10894	0.753065
1368130_at	1.03302	0.930278	1.07153	0.849185	-1.00771	0.985942
1368131_at	-1.81683	0.644478	-2.1339	0.565451	-1.76587	0.662853
1368132_at	1.06486	0.881619	-1.07931	0.864082	-1.10665	0.795774
1368133_at	1.11117	0.754145	-1.03027	0.944861	1.12516	0.718575
1368134_a_at	1.07216	0.807604	1.08893	0.774589	1.1181	0.66607
1368135_at	-1.0259	0.944244	1.01797	0.964796	1.02241	0.951656
1368136_at	-1.0798	0.820442	-1.10479	0.775038	-1.00518	0.99134
1368137_at	-1.03234	0.962731	-1.06381	0.927581	-1.14903	0.804771
1368138_at	-1.09073	0.917775	-1.20638	0.815056	-1.28945	0.71729
1368139_s_at	1.03915	0.938817	-1.1332	0.784786	-1.07097	0.883027
1368140_at	1.1014	0.796583	1.1428	0.724575	-1.04487	0.91681
1368141_at	1.00683	0.973247	1.04408	0.806	1.05554	0.729229
1368142_at	1.01381	0.963846	1.01176	0.971233	1.10721	0.655379
1368143_at	1.01806	0.969922	-1.07965	0.862914	1.07982	0.851968
1368144_at	-1.21097	0.789152	-1.33278	0.684061	-1.1631	0.840814
1368145_at	-1.21038	0.907935	1.54314	0.779094	-1.3736	0.835474
1368146_at	1.1978	0.830268	1.18986	0.850539	-1.01058	0.993074
1368147_at	1.17503	0.865793	-1.02976	0.981019	-1.08889	0.933334
1368148_at	-1.11457	0.851976	-1.03267	0.963624	-1.12419	0.836906
1368149_at	-1.05364	0.79903	1.02271	0.928374	-1.00681	0.979121
1368150_at	-1.01585	0.956426	-1.05195	0.854429	-1.04572	0.864227
1368151_at	-1.00472	0.989041	-1.01988	0.949037	-1.00635	0.985026
1368152_at	-1.00914	0.964126	-1.07566	0.653022	-1.13309	0.309602
1368153_a_at	1.04174	0.89909	-1.04884	0.888333	-1.25597	0.28082
1368154_at	-1.05868	0.88809	-1.17407	0.655379	-1.18661	0.600736
1368155_at	-1.16955	0.913755	1.27714	0.867715	1.39529	0.795695
1368156_at	1.01409	0.954027	-1.01175	0.964853	-1.06706	0.744754
1368157_at	1.02529	0.954468	1.1385	0.733571	-1.04071	0.925764
1368158_at	1.05446	0.894045	1.15118	0.694388	1.31873	0.29353
1368159_at	-1.00644	0.981842	-1.07599	0.740789	1.03563	0.880952
1368160_at	1.06853	0.9005	1.08483	0.882113	-1.08326	0.876735
1368161_a_at	1.00316	0.970344	1.01048	0.898435	-1.03299	0.595555
1368162_at	-1.03111	0.963167	1.27495	0.64567	1.05569	0.931595
1368163_at	1.07505	0.895893	1.04699	0.94072	1.02004	0.974561
1368164_at	1.06107	0.86711	-1.02685	0.948474	-1.06254	0.86354
1368165_at	1.00642	0.981357	1.00803	0.977611	-1.00699	0.979059
1368166_at	1.02659	0.913806	-1.07275	0.752286	-1.02437	0.921827
1368167_at	-1.02858	0.986106	-1.00936	0.996008	-1.18475	0.897484
1368168_at	-1.11389	0.857195	1.06089	0.931595	-1.16401	0.786198
1368169_at	1.09967	0.711652	1.05214	0.869451	1.05181	0.861719
1368170_at	-1.03372	0.907451	1.04448	0.88166	1.09576	0.701107
1368171_at	-1.72996	0.584895	-1.3238	0.821318	-1.0337	0.982482
1368172_a_at	-1.79253	0.592035	-1.17325	0.91395	-1.31966	0.825898
1368173_at	-1.03947	0.937474	1.07206	0.888511	-1.05975	0.903118
1368174_at	-1.60632	0.660907	-1.13265	0.931349	1.08236	0.954468
1368175_at	-1.01481	0.952413	-1.11197	0.589699	-1.03371	0.88436
1368176_at	1.00631	0.980735	1.00527	0.985402	-1.04221	0.844617
1368177_at	1.10217	0.789847	1.22771	0.53666	1.20092	0.563123
1368178_at	-1.00902	0.991368	1.04542	0.951288	1.03914	0.955337
1368179_at	1.11072	0.694134	1.08694	0.781796	-1.04071	0.89909
1368180_s_at	1.37603	0.680962	1.94931	0.311063	3.37789	0.0241298
1368181_at	1.14285	0.606928	1.16489	0.5725	1.4056	0.0678249
1368182_at	1.03828	0.906162	1.04149	0.904683	1.00357	0.993249
1368183_at	-1.15872	0.680006	-1.19839	0.621017	-1.22913	0.527061
1368184_at	1.10483	0.704303	1.21689	0.402404	1.35794	0.0877099
1368185_at	1.02347	0.957952	1.08426	0.847024	1.03115	0.943253
1368186_a_at	-1.01245	0.979703	1.03418	0.943253	-1.07513	0.858787
1368187_at	-1.02275	0.978716	1.02606	0.977153	-1.11656	0.876438
1368188_at	1.06643	0.786248	1.0587	0.825485	1.09683	0.672695
1368189_at	1.07242	0.873724	1.17441	0.68915	1.14438	0.728454
1368190_at	1.22679	0.922949	-1.3866	0.877582	-1.24846	0.91506
1368191_a_at	1.12327	0.809645	1.2551	0.613619	1.55596	0.165964
1368192_at	1.11548	0.781855	1.2056	0.620673	1.22397	0.552053
1368193_at	-1.11391	0.838351	-1.08853	0.884271	-1.13218	0.808177
1368194_at	-1.16538	0.799628	-1.07811	0.916306	-1.29743	0.62523
1368195_at	1.0688	0.793494	-1.02236	0.943886	1.00322	0.993074
1368196_at	-1.34826	0.9151	1.05915	0.987405	-2.82078	0.643571
1368197_at	-1.05134	0.9325	-1.2493	0.655379	-1.07769	0.895188
1368198_at	1.09894	0.778391	1.10793	0.773362	1.15492	0.634108
1368199_at	-1.04897	0.861786	-1.08636	0.754145	-1.01508	0.961384
1368200_at	-1.05315	0.95798	-1.06775	0.949446	-1.29151	0.750946
1368201_at	1.02679	0.94143	-1.02137	0.957022	-1.10528	0.738243
1368202_a_at	-1.06362	0.955579	1.07229	0.952652	-1.29537	0.781431
1368203_at	1.09843	0.72592	1.04237	0.899312	1.05791	0.849185
1368204_at	1.02184	0.934129	-1.015	0.958746	-1.00781	0.978699
1368205_at	-1.00474	0.986588	-1.07956	0.713155	-1.01235	0.960545
1368206_at	1.02557	0.94506	-1.03693	0.924783	1.02693	0.941374
1368207_at	-1.07817	0.850539	-1.12145	0.771706	-1.18123	0.619679
1368208_at	1.06453	0.922323	-1.36579	0.540798	-1.21447	0.713983
1368209_at	1.14308	0.926512	1.19913	0.903348	-1.09297	0.95182
1368210_at	1.1261	0.583279	1.13625	0.575415	1.05867	0.820309
1368211_at	-1.01432	0.933108	-1.01733	0.924332	-1.03563	0.814781
1368212_at	-1.01393	0.938476	-1.06381	0.684844	1.00733	0.969216
1368213_at	1.18406	0.812262	1.50816	0.51231	2.5521	0.0372584
1368214_at	1.01968	0.926311	1.03371	0.874749	1.08731	0.603642
1368215_at	-1.02905	0.925197	-1.02372	0.942861	-1.03995	0.893028
1368216_at	-1.07779	0.693154	-1.07877	0.710348	-1.02318	0.921117
1368217_at	-1.04647	0.848263	-1.14213	0.503028	-1.00771	0.978699
1368218_at	1.05623	0.902245	-1.08264	0.861182	1.00126	0.998047
1368219_at	1.11477	0.780319	-1.13425	0.757255	1.07573	0.862813
1368220_at	1.06085	0.887362	-1.00532	0.993042	-1.22283	0.536834
1368221_at	1.08658	0.828142	-1.02311	0.962246	1.00161	0.99746
1368222_at	1.00584	0.991886	1.00047	0.999344	-1.00176	0.99746
1368223_at	1.028	0.964463	-1.03333	0.960302	-1.0286	0.963846
1368224_at	1.04079	0.893086	-1.08985	0.758868	1.14659	0.553469
1368225_at	-1.03899	0.876551	-1.10998	0.629904	-1.11191	0.596069
1368226_at	1.1232	0.726271	1.14373	0.696997	1.225	0.474772
1368227_at	1.14235	0.775617	1.14413	0.787732	1.22766	0.625264
1368228_at	-1.04066	0.872449	-1.19687	0.326634	1.01619	0.952332
1368229_at	-1.05465	0.834704	-1.07669	0.775038	-1.08381	0.733067
1368230_a_at	-1.01571	0.96422	1.06724	0.839041	1.07058	0.815667
1368231_at	-1.01803	0.949037	1.08688	0.734545	-1.01401	0.961808
1368232_at	1.07237	0.882686	1.01892	0.974403	1.05196	0.918809
1368233_at	1.05662	0.859599	1.16556	0.568352	1.21761	0.383322
1368234_at	1.08241	0.698097	1.07833	0.734571	1.21133	0.200108
1368235_at	-1.00334	0.993101	-1.06488	0.827525	1.004	0.991529
1368236_at	1.06757	0.988869	1.5909	0.907804	-1.41363	0.928545
1368237_at	-2.19124	0.498487	-1.5497	0.763274	-1.81558	0.630048
1368238_at	1.02527	0.982951	1.52544	0.610786	1.57165	0.546619
1368239_at	1.0847	0.849688	1.08111	0.865919	1.30145	0.407289
1368240_a_at	1.14782	0.789356	-1.01619	0.982398	1.05786	0.924992
1368241_a_at	-1.01952	0.963373	-1.20695	0.556712	-1.2562	0.407289
1368242_at	-1.18766	0.603551	-1.23636	0.527977	-1.11777	0.760656
1368243_at	1.10628	0.669683	1.05575	0.851677	1.06096	0.821373
1368244_at	1.03696	0.926025	-1.01464	0.974213	1.04254	0.913305
1368245_at	1.02369	0.949427	1.01663	0.967945	1.03477	0.925289
1368246_at	-1.00046	0.999285	1.0592	0.880946	-1.12362	0.71039
1368247_at	-1.17285	0.817658	-1.16806	0.836364	1.09074	0.909104
1368248_at	1.01569	0.98858	1.45597	0.610719	-1.12935	0.885444
1368249_at	1.06825	0.910849	-1.07517	0.907804	-1.00474	0.995384
1368250_at	1.00307	0.996695	-1.07696	0.903497	-1.12871	0.817023
1368251_at	1.01025	0.980567	1.05556	0.884586	1.07321	0.832882
1368252_at	-4.75747	0.498694	-2.00796	0.815396	-1.28236	0.937911
1368253_at	1.08566	0.82906	1.14456	0.717018	1.02931	0.946428
1368254_a_at	-1.02102	0.981588	-1.18332	0.821443	-1.22525	0.763324
1368255_at	-1.08739	0.759954	-1.03596	0.915896	-1.12233	0.647943
1368256_at	1.01097	0.983422	1.11974	0.785525	1.07751	0.858267
1368257_at	1.0297	0.913755	1.04409	0.875231	1.01505	0.957952
1368258_at	-1.08076	0.837108	1.00701	0.989696	-1.02766	0.948694
1368259_at	1.14145	0.808938	-1.04801	0.944458	-1.03366	0.959299
1368260_at	-1.06793	0.871298	-1.05425	0.906162	1.08787	0.827539
1368261_at	1.00284	0.99393	1.00528	0.988631	-1.00539	0.987649
1368262_at	1.00071	0.998952	-1.12993	0.749282	-1.06376	0.876952
1368263_a_at	1.00535	0.986164	-1.00551	0.986588	-1.02368	0.928456
1368264_at	1.13794	0.821318	1.07917	0.909011	-1.01993	0.978219
1368265_at	-1.18392	0.685418	-1.26034	0.579133	-1.08867	0.859343
1368266_at	1.04972	0.86719	1.02882	0.931431	1.1142	0.659655
1368267_at	1.04592	0.844564	1.04953	0.841797	1.18402	0.283156
1368268_at	-1.06956	0.838406	-1.02463	0.950504	-1.14289	0.637529
1368269_at	1.02827	0.993408	4.41662	0.449671	-1.39562	0.893845
1368270_at	1.18798	0.800682	1.05061	0.95355	1.0993	0.899077
1368271_a_at	-1.52083	0.572467	-1.33589	0.739486	1.05231	0.960054
1368272_at	1.08692	0.87198	-1.01288	0.985388	-1.25183	0.594025
1368273_at	-1.04198	0.909858	1.05852	0.878854	-1.05555	0.877073
1368274_at	1.04356	0.880364	1.02596	0.936447	1.03422	0.908403
1368275_at	1.1047	0.882686	1.33428	0.626883	1.26743	0.681433
1368276_at	1.05157	0.816587	1.15159	0.44351	1.11005	0.5725
1368277_at	-1.15883	0.537364	1.0175	0.961626	-1.25549	0.250024
1368278_at	1.00984	0.990889	1.07706	0.917376	-1.27763	0.649397
1368279_at	-1.23062	0.756239	-1.32529	0.674777	-1.28881	0.689956
1368280_at	1.05038	0.899883	1.04674	0.91395	1.15534	0.652519
1368281_at	1.00367	0.997588	1.46142	0.654099	-1.03145	0.978159
1368282_at	1.05591	0.938622	1.36251	0.587008	1.02269	0.977208
1368283_at	-1.0155	0.983364	-1.13076	0.841093	-1.04436	0.946014
1368284_at	1.0327	0.965299	-1.11063	0.881537	-1.29376	0.63857
1368285_at	1.12903	0.624203	1.09945	0.737501	1.16848	0.495929
1368286_at	1.0036	0.996427	1.19218	0.748468	-1.07831	0.897607
1368287_at	1.05798	0.884865	1.06825	0.873003	1.03585	0.931964
1368288_at	1.00128	0.994402	-1.01262	0.932984	-1.00667	0.963889
1368289_at	-1.10751	0.873623	1.02855	0.970943	1.13476	0.838216
1368290_at	1.08352	0.919634	1.17427	0.835488	1.40018	0.581427
1368291_at	1.07286	0.796347	1.00376	0.993042	1.06913	0.807051
1368292_at	-1.04012	0.9005	1.1146	0.70127	1.01612	0.962978
1368293_at	-1.03887	0.898728	-1.02193	0.949037	1.04934	0.869072
1368294_at	1.10469	0.860918	1.10535	0.869072	1.062	0.920761
1368295_at	1.0443	0.916082	1.04806	0.914753	1.33164	0.27812
1368296_at	1.05325	0.922245	1.05272	0.928267	1.29772	0.498112
1368297_at	-1.18833	0.805311	-1.36872	0.634532	-1.22858	0.761993
1368298_at	1.09927	0.756432	1.0588	0.873891	1.06234	0.855849
1368299_at	1.03651	0.898879	-1.0155	0.962978	1.00529	0.987916
1368300_at	-1.03082	0.905578	1.11916	0.6009	-1.00921	0.974371
1368301_at	1.05482	0.86334	1.14571	0.620248	1.0834	0.778815
1368302_at	-1.00618	0.981397	1.06067	0.781818	-1.0127	0.957839
1368303_at	-1.25826	0.63892	-1.00983	0.990521	1.12696	0.830312
1368304_at	-1.39966	0.696265	-1.13855	0.905157	-1.17209	0.872478
1368305_at	1.12994	0.807497	-1.06226	0.919636	1.00138	0.998266
1368306_at	1.03335	0.908865	1.13443	0.598531	1.09316	0.712521
1368307_at	1.05104	0.855694	1.11542	0.661937	-1.00614	0.985942
1368308_at	1.09061	0.871074	1.11518	0.844408	1.07447	0.895453
1368309_at	1.00676	0.986171	-1.07975	0.802691	-1.0643	0.833798
1368310_at	-1.92119	0.637876	-1.68969	0.738991	-1.39755	0.833368
1368311_at	1.06742	0.894558	1.03181	0.955409	-1.14341	0.75745
1368312_at	-1.00837	0.983388	1.02568	0.945701	-1.03205	0.926616
1368313_a_at	1.03273	0.930575	-1.12611	0.713155	1.16769	0.578867
1368314_at	1.01979	0.968236	1.02901	0.955233	1.38327	0.260584
1368315_at	1.06224	0.726362	1.10619	0.536788	1.05894	0.741486
1368316_at	1.15251	0.736659	1.22821	0.620954	1.14581	0.748403
1368317_at	-1.07764	0.856045	-1.02776	0.955233	-1.03695	0.935544
1368318_at	-1.08746	0.866318	1.01337	0.984131	1.09219	0.857985
1368319_a_at	-1.15926	0.631772	1.12319	0.742107	-1.02675	0.947461
1368320_at	1.00035	0.999489	1.20568	0.642581	1.04236	0.931595
1368321_at	1.02457	0.984735	-1.14565	0.902369	-1.72113	0.477559
1368322_at	-1.00391	0.997633	-1.37417	0.745868	-1.33606	0.754024
1368323_at	1.11381	0.684061	-1.0157	0.966313	1.16604	0.523439
1368324_at	1.08533	0.64938	1.12044	0.523378	1.07145	0.71194
1368325_at	1.1185	0.825132	-1.16758	0.764328	1.07082	0.90122
1368326_at	-1.06471	0.809528	1.00037	0.999293	-1.10218	0.680963
1368327_at	1.02372	0.931532	1.15609	0.487394	-1.00085	0.997743
1368328_at	1.08749	0.927496	-1.23638	0.806256	-1.13977	0.880946
1368329_at	1.13805	0.951689	-1.47774	0.850012	-1.1984	0.931474
1368330_at	1.02977	0.921809	1.06548	0.823607	1.02191	0.942927
1368331_at	1.08185	0.761058	1.131	0.622466	1.17664	0.445749
1368332_at	1.20865	0.845344	1.10276	0.93103	1.16189	0.880364
1368333_at	1.06596	0.984461	-1.97282	0.791094	-1.50582	0.874909
1368334_at	-1.00028	0.999751	-1.16875	0.77855	-1.36921	0.466943
1368335_at	1.01653	0.894045	1.01105	0.936179	-1.00765	0.953717
1368336_at	1.11052	0.667762	1.02526	0.939076	1.09266	0.726464
1368337_at	1.10214	0.781822	1.1796	0.623084	1.14423	0.678837
1368338_at	-1.17326	0.880364	-1.30982	0.796461	-1.11904	0.919173
1368339_at	-1.25404	0.871706	1.47194	0.777719	-1.41296	0.789543
1368340_at	1.07808	0.880952	1.13806	0.79308	-1.05721	0.915055
1368341_at	-1.19326	0.646122	1.0946	0.85008	1.10875	0.809906
1368342_at	-1.18937	0.849343	-1.61035	0.541738	-1.50815	0.583396
1368343_at	1.0606	0.763872	1.07645	0.713766	1.05231	0.799183
1368344_at	1.09505	0.778143	-1.00469	0.992657	-1.02977	0.937823
1368345_at	1.06328	0.670653	1.10137	0.482526	-1.10537	0.421014
1368346_at	1.03191	0.935632	1.10078	0.787756	1.0934	0.789327
1368347_at	-1.28836	0.683398	-1.09917	0.905205	-1.01097	0.99098
1368348_at	1.00512	0.994674	1.18887	0.736599	-1.08437	0.881586
1368349_at	-1.06161	0.915394	1.55956	0.241419	-1.00048	0.999344
1368350_at	-1.22885	0.726843	-1.26266	0.705123	1.10172	0.884271
1368351_at	1.07841	0.792621	1.1636	0.567191	1.15828	0.548291
1368352_at	-1.07352	0.843652	-1.03226	0.939888	-1.05414	0.886789
1368353_at	-1.05001	0.937342	-1.05453	0.936118	-1.08928	0.88251
1368354_at	1.02259	0.952114	1.08161	0.820931	1.3862	0.11503
1368355_at	1.08555	0.920816	1.18116	0.83539	1.06165	0.943253
1368356_a_at	-1.00296	0.996429	1.17381	0.726342	1.26746	0.535969
1368357_at	1.11274	0.768144	1.07529	0.862647	1.01844	0.967246
1368358_a_at	-1.01537	0.991886	1.11696	0.930431	-1.11831	0.925054
1368359_a_at	1.12041	0.603642	1.07103	0.794569	1.09638	0.687371
1368360_at	-1.01068	0.964237	-1.04579	0.837851	-1.14714	0.362447
1368361_a_at	-1.02522	0.874331	-1.00442	0.982951	1.01559	0.926512
1368362_a_at	1.04871	0.93416	1.01895	0.978219	-1.0752	0.895364
1368363_at	-1.60137	0.726464	1.09513	0.959705	-1.66249	0.699623
1368364_at	1.13336	0.575415	1.15605	0.528147	1.1238	0.603642
1368365_at	1.00525	0.991003	-1.03638	0.927354	1.10085	0.759904
1368366_at	1.07297	0.901278	-1.0119	0.987337	-1.02224	0.971738
1368367_at	1.05823	0.840899	1.15547	0.557123	1.08774	0.745751
1368368_a_at	1.08559	0.845268	1.05938	0.903116	1.04351	0.926025
1368369_at	-1.14091	0.678819	1.02909	0.946427	-1.06557	0.863308
1368370_at	-1.01039	0.985956	-1.18433	0.694677	-1.23635	0.573274
1368371_at	-1.01128	0.986223	-1.13851	0.800396	-1.26637	0.568336
1368372_at	-1.03312	0.955781	-1.1186	0.840911	-1.06167	0.915306
1368373_at	1.02048	0.946014	1.07623	0.787177	1.08817	0.731104
1368374_a_at	1.06551	0.979969	-1.03793	0.989976	1.46391	0.856045
1368375_a_at	-1.02579	0.942254	-1.09091	0.786278	-1.17857	0.518584
1368376_at	-1.01966	0.985115	-1.19696	0.82948	1.06978	0.939061
1368377_at	1.28347	0.494145	1.2275	0.62088	1.1115	0.810517
1368378_at	1.16191	0.633249	1.22061	0.527533	1.33692	0.238409
1368379_at	1.10213	0.79903	1.18103	0.649371	1.83046	0.0148719
1368380_at	1.02516	0.88251	-1.0231	0.901921	1.00061	0.997669
1368381_at	1.08889	0.75096	1.16551	0.540877	1.05649	0.850754
1368382_at	-1.08594	0.707833	-1.01921	0.947539	1.02961	0.911045
1368383_at	1.06454	0.784757	1.00513	0.987862	-1.01327	0.962427
1368384_at	1.07787	0.706809	1.00079	0.997796	-1.00224	0.994331
1368385_a_at	1.06015	0.856872	1.05186	0.884865	1.18881	0.490974
1368386_at	1.10965	0.607736	1.02455	0.930927	1.02679	0.918234
1368387_at	1.04017	0.939699	1.03081	0.957213	-1.03444	0.948589
1368388_at	1.04203	0.920776	1.12559	0.752558	-1.13396	0.713983
1368389_at	1.02348	0.958174	1.07364	0.867916	1.00298	0.995912
1368390_at	1.08419	0.738357	1.0667	0.81068	1.10193	0.674009
1368391_at	-1.17547	0.807521	-1.20722	0.786278	-1.25994	0.708695
1368392_at	-1.13795	0.812262	-1.14099	0.821373	-1.28106	0.6009
1368393_at	-1.04826	0.863308	-1.17163	0.47958	-1.13944	0.549193
1368394_at	-1.13637	0.763324	-1.29776	0.494729	-1.21616	0.60723
1368395_at	-1.03806	0.975982	-1.43311	0.71558	-1.32203	0.77299
1368396_at	-1.3106	0.899715	-1.15222	0.953536	-2.00117	0.702866
1368397_at	1.03932	0.867932	1.34941	0.0445231	1.41086	0.0148719
1368398_at	-1.17993	0.813246	1.06318	0.942856	-1.05656	0.945728
1368399_a_at	1.07984	0.76665	-1.00099	0.997796	1.04244	0.88345
1368400_at	1.08612	0.804797	1.16032	0.63892	1.22989	0.438429
1368401_at	-1.0473	0.948303	1.0155	0.986033	-1.40634	0.498487
1368402_at	-1.01827	0.920764	-1.11484	0.42546	-1.08977	0.523439
1368403_at	1.07657	0.871298	-1.09152	0.854952	1.03216	0.949037
1368404_at	-1.19093	0.862271	-1.27397	0.810301	-1.36759	0.726271
1368405_at	1.01291	0.964796	1.08736	0.734177	1.02152	0.939061
1368406_at	-1.03187	0.933483	1.02045	0.961808	-1.00613	0.989349
1368407_at	1.02622	0.966978	-1.06321	0.921876	1.11349	0.842275
1368408_at	1.03678	0.91167	1.10196	0.744754	1.32654	0.137476
1368409_at	1.20504	0.618003	1.2339	0.590473	1.74349	0.0372584
1368410_at	1.03227	0.944413	1.01361	0.979682	1.05306	0.905243
1368411_a_at	1.00896	0.981019	1.09596	0.757681	1.03452	0.916039
1368412_a_at	1.10446	0.935401	-1.44764	0.733017	-1.27845	0.819812
1368413_at	1.00075	0.999789	3.13863	0.491829	1.06599	0.978859
1368414_at	-1.07723	0.963136	-1.42073	0.806342	-1.42203	0.791761
1368415_at	-4.47658	0.551624	-1.51499	0.90482	-1.58571	0.883592
1368416_at	1.05497	0.814495	1.03278	0.903909	1.08335	0.70436
1368417_at	1.12105	0.583952	1.00174	0.996381	1.06725	0.782142
1368418_a_at	1.04607	0.913755	-1.0757	0.862833	1.19592	0.577155
1368419_at	1.18451	0.702258	1.02904	0.962731	1.09953	0.849343
1368420_at	1.01419	0.967439	-1.01475	0.968327	1.11511	0.677315
1368421_at	1.12736	0.291662	1.04706	0.776861	1.04095	0.794987
1368422_at	-1.17255	0.884271	1.19275	0.879529	1.36941	0.748042
1368423_at	1.08747	0.956886	1.2298	0.893343	-1.22812	0.884865
1368424_at	-1.00565	0.989027	-1.06079	0.86062	-1.10036	0.735333
1368425_at	1.15418	0.641043	1.10746	0.775628	1.00773	0.986664
1368426_at	1.01152	0.981424	1.22209	0.563239	1.19028	0.598165
1368427_at	1.07127	0.784075	-1.0396	0.895797	1.16845	0.448355
1368428_at	1.13682	0.755489	-1.20234	0.652448	-1.4979	0.150695
1368429_at	-1.15015	0.589606	-1.102	0.749282	1.02837	0.934341
1368430_at	-1.01247	0.985942	1.13658	0.820309	-1.07534	0.899077
1368431_at	1.09103	0.825208	1.03842	0.93653	1.15259	0.692347
1368432_a_at	1.06794	0.876493	-1.00798	0.989041	1.04256	0.92641
1368433_at	-1.02547	0.935632	-1.0211	0.950152	1.0515	0.861346
1368434_at	1.05322	0.927216	1.04216	0.946349	1.16935	0.743719
1368435_at	1.08565	0.939061	-1.10617	0.929421	1.09508	0.932168
1368436_at	1.02568	0.875368	1.03379	0.842418	1.1661	0.11503
1368437_at	-1.04697	0.974233	-1.44246	0.75745	-1.32212	0.808938
1368438_at	1.02665	0.943217	1.01725	0.966869	-1.03915	0.914632
1368439_at	-1.04843	0.821728	1.11412	0.568336	1.17728	0.265482
1368440_at	1.04617	0.98968	-1.47061	0.894745	-1.36341	0.911616
1368441_at	-1.22074	0.633249	-1.07488	0.89485	-1.14602	0.764472
1368442_at	1.01396	0.951288	-1.00802	0.975361	1.0143	0.950038
1368443_at	1.05131	0.838131	1.08273	0.741399	-1.0496	0.844564
1368444_at	1.05528	0.875231	-1.04082	0.916207	1.08665	0.793708
1368445_at	1.0364	0.922654	1.05494	0.885194	1.10148	0.75854
1368446_at	1.14727	0.877975	-1.20229	0.842051	1.58176	0.50651
1368447_x_at	1.10147	0.915785	-1.27337	0.776861	1.06596	0.946081
1368448_at	1.04754	0.92024	1.0372	0.942254	1.04125	0.93136
1368449_at	1.08389	0.7329	1.08124	0.75854	-1.06256	0.805462
1368450_at	-1.02787	0.976163	-1.17607	0.841675	-1.21373	0.789327
1368451_at	1.0999	0.659158	1.06759	0.794829	1.00009	0.999812
1368452_at	1.00874	0.987514	-1.05277	0.915617	-1.11568	0.785678
1368453_at	-1.14011	0.804122	-1.12642	0.838153	-1.20035	0.713152
1368454_at	-1.00496	0.989715	-1.02459	0.942879	1.03889	0.900167
1368455_at	-1.10562	0.918412	-1.3747	0.715971	-1.3546	0.711652
1368456_at	1.05537	0.794445	1.12338	0.531955	1.05979	0.775073
1368457_at	-1.03563	0.926139	-1.00423	0.99356	-1.00042	0.99931
1368458_at	-1.47752	0.717738	1.53264	0.7088	1.43222	0.744737
1368459_at	-1.12463	0.83811	-1.11007	0.86836	-1.1271	0.834084
1368460_at	1.04031	0.931853	1.12858	0.775294	1.08931	0.838544
1368461_at	1.03502	0.943179	-1.26863	0.526523	-1.28867	0.453993
1368462_at	1.05347	0.902548	1.17798	0.65663	1.13795	0.720297
1368463_at	1.0167	0.957596	1.15573	0.545273	1.22572	0.286764
1368464_at	-1.01371	0.974686	1.09684	0.802785	1.02624	0.949037
1368465_at	1.00265	0.99781	-1.18466	0.841463	-1.23529	0.778143
1368466_a_at	1.08071	0.817493	1.0266	0.949037	1.05735	0.875757
1368467_at	1.06049	0.904077	1.1111	0.823996	1.06359	0.897923
1368468_at	1.21926	0.309698	1.29869	0.168251	1.25979	0.203638
1368469_at	1.06548	0.878543	1.04362	0.927334	1.09102	0.823657
1368470_at	1.0046	0.995921	-1.11122	0.876455	-1.16581	0.795774
1368471_at	-1.00069	0.999874	2.80276	0.597228	-1.38256	0.885439
1368472_at	1.09119	0.712853	1.06202	0.824542	1.08339	0.738787
1368473_at	1.01917	0.979059	-1.22616	0.722799	1.01974	0.978666
1368474_at	-1.07367	0.907919	-1.26871	0.653626	-1.2836	0.605793
1368475_at	-1.04267	0.930549	-1.0376	0.942781	1.10871	0.805201
1368476_at	-1.04259	0.904643	1.0029	0.995536	1.30171	0.223661
1368477_at	-1.16676	0.801637	-1.04348	0.955547	-1.46766	0.432214
1368478_at	1.10381	0.687313	1.10052	0.718867	1.1399	0.566206
1368479_at	1.12164	0.510282	1.03366	0.890796	1.11777	0.523835
1368480_at	-1.05891	0.748468	-1.05264	0.793367	-1.21214	0.108111
1368481_at	1.06089	0.852359	1.16452	0.583396	1.0419	0.902019
1368482_at	1.19003	0.756239	1.23783	0.712521	1.08928	0.892409
1368483_a_at	1.02382	0.940885	1.0372	0.91167	1.00365	0.992835
1368484_at	-1.03791	0.962985	-1.21577	0.779194	-1.38339	0.573016
1368485_at	-1.11804	0.724591	1.02072	0.961654	1.15228	0.631483
1368486_at	1.03113	0.926936	-1.06775	0.839966	1.05322	0.868743
1368487_at	-1.16698	0.835323	-1.13483	0.877387	1.28971	0.704353
1368488_at	-1.1157	0.745682	1.09019	0.818508	-1.09254	0.800445
1368489_at	1.04109	0.918323	1.07014	0.864752	1.0552	0.886979
1368490_at	1.1082	0.863308	1.04123	0.953879	1.37162	0.492648
1368491_at	1.02564	0.970649	-1.00532	0.995496	1.08636	0.894273
1368492_at	1.04703	0.93176	-1.00604	0.99356	1.03351	0.951842
1368493_at	1.10607	0.733392	1.116	0.724591	1.10807	0.725926
1368494_at	-1.22351	0.695545	-1.15328	0.809645	-1.48721	0.332736
1368495_at	1.0411	0.908833	1.01819	0.964237	1.10607	0.738243
1368496_at	1.00278	0.994296	1.02971	0.926616	1.04691	0.869771
1368497_at	1.18552	0.704244	1.55455	0.213431	2.33958	0.00826668
1368498_a_at	1.0383	0.984307	-1.38965	0.831935	-1.31607	0.854689
1368499_at	1.03894	0.888705	1.01487	0.963373	1.00328	0.99296
1368500_a_at	-1.00157	0.995921	1.08698	0.685884	1.06339	0.764328
1368501_s_at	1.04653	0.964957	1.15089	0.8877	-1.38212	0.682887
1368502_at	1.06967	0.789846	1.15955	0.51229	1.17674	0.417937
1368503_at	1.0398	0.952847	-1.01832	0.981687	1.0912	0.886344
1368504_at	-1.03913	0.846772	1.00266	0.992806	-1.09718	0.567264
1368505_at	-1.26389	0.749209	1.00623	0.995921	1.07685	0.931702
1368506_at	-1.08299	0.916996	1.01797	0.985401	-1.12336	0.873463
1368507_at	1.09228	0.730148	1.18995	0.453101	1.28955	0.151234
1368508_at	1.00005	0.999874	1.02082	0.951729	1.14408	0.569985
1368509_at	1.0467	0.895112	-1.07863	0.823996	1.1016	0.750012
1368510_at	-1.08046	0.955307	-1.33921	0.817491	-1.26976	0.847449
1368511_at	1.04293	0.937116	-1.11312	0.833621	-1.09771	0.849185
1368512_a_at	-1.03386	0.983722	1.24575	0.874893	-1.10644	0.942781
1368513_at	-1.01892	0.960997	-1.21511	0.486934	-1.14908	0.624295
1368514_at	1.074	0.881994	1.24677	0.596555	1.21857	0.616787
1368515_at	-1.05742	0.939688	1.01606	0.986216	-1.10131	0.889649
1368516_at	-1.08218	0.644478	-1.11849	0.504584	-1.06557	0.724575
1368517_at	-1.14441	0.763324	-1.12934	0.803136	-1.25334	0.567191
1368518_at	1.00945	0.989291	-1.09867	0.869295	-1.03298	0.95612
1368519_at	1.05477	0.943557	1.0417	0.960796	1.5518	0.381291
1368520_at	1.32005	0.868917	5.10965	0.14399	4.10805	0.18447
1368521_at	1.0915	0.945969	-1.60704	0.658052	-1.4704	0.712312
1368522_at	-1.03177	0.902548	-1.08603	0.720971	-1.09545	0.661832
1368523_at	1.00868	0.991044	1.18119	0.764692	-1.20253	0.714277
1368524_at	-1.03318	0.895112	1.05468	0.827591	1.05115	0.828287
1368525_at	-1.05604	0.88945	1.03696	0.934498	-1.00381	0.994331
1368526_at	1.03991	0.908403	-1.01826	0.963045	-1.01122	0.977146
1368527_at	-1.32164	0.913246	-2.24777	0.724922	-1.57201	0.850539
1368528_at	-1.06054	0.909645	-1.19141	0.705102	1.1314	0.788747
1368529_at	1.01038	0.974152	1.06568	0.819326	1.14823	0.523835
1368530_at	-1.0357	0.924261	-1.0655	0.862392	1.01127	0.978244
1368531_at	1.01224	0.947129	1.03048	0.867563	1.05683	0.708908
1368532_at	-1.79769	0.864227	-1.53017	0.911518	-4.10429	0.619933
1368533_at	1.01133	0.990564	-1.02027	0.983334	-1.24181	0.736599
1368534_at	1.05382	0.808445	1.09281	0.670952	1.11413	0.555173
1368535_at	1.04684	0.894796	1.07127	0.844582	-1.01588	0.966952
1368536_at	-1.05868	0.913755	1.05007	0.931853	-1.11656	0.816223
1368537_at	1.05088	0.838131	-1.0857	0.728454	1.05929	0.806197
1368538_at	1.06764	0.859313	1.04576	0.913928	1.01228	0.9782
1368539_at	1.03766	0.874893	1.20451	0.263689	1.09875	0.626614
1368540_at	-1.1707	0.794356	-1.41312	0.523439	-1.47441	0.414769
1368541_at	-1.07724	0.942761	-1.30505	0.776634	-1.18917	0.854952
1368542_at	-1.21772	0.780406	-1.28965	0.725614	-1.38232	0.607597
1368543_at	1.07384	0.955233	-1.17377	0.898967	-1.2942	0.812024
1368544_a_at	-1.36583	0.710172	-1.30054	0.777719	-1.28768	0.771706
1368545_at	1.03388	0.933677	1.08885	0.822028	1.07302	0.848526
1368546_at	-1.12133	0.713983	-1.1199	0.736949	-1.09397	0.783426
1368547_at	1.05606	0.864082	1.07342	0.82664	1.06105	0.85008
1368548_at	-1.08384	0.987594	-3.33696	0.757261	-1.29408	0.953477
1368549_at	1.07633	0.781277	-1.17776	0.486397	1.03131	0.918512
1368550_at	-1.01119	0.988013	-1.14622	0.81579	-1.2768	0.610741
1368551_at	1.01154	0.980034	-1.02285	0.960802	1.04094	0.921827
1368552_at	1.06379	0.651211	1.0366	0.825273	1.08398	0.523378
1368553_at	-1.10963	0.869539	-1.18997	0.778973	-1.21675	0.727644
1368554_at	1.0234	0.941783	1.1143	0.688938	1.09698	0.722323
1368555_at	-1.05514	0.926936	-1.09663	0.874909	-1.12671	0.817738
1368556_at	1.02371	0.913813	1.0838	0.667958	1.04901	0.804738
1368557_s_at	1.15033	0.634465	1.17862	0.590982	1.08422	0.807051
1368558_s_at	1.1453	0.804738	1.07032	0.917314	-1.05714	0.929135
1368559_at	1.15383	0.795684	-1.05094	0.941396	1.27087	0.624636
1368560_at	1.18365	0.652301	1.20547	0.631483	1.24556	0.525581
1368561_at	1.13288	0.888371	1.42355	0.654099	-1.13928	0.882113
1368562_at	-1.00368	0.992042	1.16999	0.476001	1.06887	0.790058
1368563_at	1.45892	0.606121	1.12738	0.902766	1.07803	0.937091
1368564_at	1.08628	0.768173	1.03939	0.909104	-1.04514	0.885642
1368565_at	-1.01991	0.982788	1.32214	0.680499	1.33535	0.64188
1368566_a_at	1.01035	0.977657	1.0273	0.939061	1.02298	0.945818
1368567_at	1.11138	0.787742	1.10394	0.815518	1.06174	0.888689
1368568_at	1.11919	0.968352	-1.81746	0.811822	-1.44718	0.883027
1368569_at	1.00421	0.99692	1.4398	0.601711	1.88589	0.220545
1368570_at	1.04837	0.949037	-1.07817	0.921827	-1.11109	0.877073
1368571_at	1.01233	0.988398	-1.11845	0.872685	-1.24756	0.697734
1368572_a_at	1.00945	0.983315	1.12621	0.726843	1.0069	0.987999
1368573_at	1.14123	0.66837	1.10999	0.764959	1.31138	0.253651
1368574_at	1.08749	0.869297	-1.0624	0.915301	1.05317	0.92441
1368575_at	1.0774	0.966352	-1.42291	0.824315	-1.29453	0.869295
1368576_at	1.04804	0.98216	-1.51762	0.807854	-1.42602	0.828329
1368577_at	1.0261	0.943886	1.00845	0.98537	1.06131	0.859053
1368578_at	1.04396	0.908803	-1.00492	0.992624	1.02696	0.945818
1368579_at	1.01448	0.960014	-1.02689	0.927336	1.02349	0.9325
1368580_at	1.01945	0.962184	-1.03408	0.935227	-1.01403	0.973223
1368581_at	1.11561	0.702137	1.08061	0.812959	-1.05228	0.876664
1368582_at	1.00163	0.997132	-1.08358	0.810301	1.03828	0.914385
1368583_a_at	1.0251	0.943312	-1.05288	0.881586	-1.02187	0.950693
1368584_a_at	-1.08783	0.820556	-1.0788	0.853607	-1.21587	0.523835
1368585_at	-1.00115	0.998085	1.28841	0.421845	1.04272	0.921117
1368586_at	1.08936	0.905153	1.00857	0.993286	-1.14729	0.837704
1368587_at	1.02014	0.828329	1.00334	0.978244	-1.01778	0.85256
1368588_at	1.01275	0.975426	1.03144	0.939061	1.2284	0.437386
1368589_at	1.01727	0.982692	-1.04187	0.956426	-1.13406	0.840151
1368590_at	-1.09376	0.855694	-1.06373	0.911045	-1.04371	0.936149
1368591_at	-1.01022	0.970344	1.02311	0.933677	1.00408	0.98968
1368592_at	1.11967	0.882787	1.14313	0.869416	1.13722	0.866517
1368593_at	1.20691	0.800468	1.37751	0.653656	1.17374	0.834084
1368594_at	1.10364	0.728393	1.19109	0.506907	1.10444	0.724591
1368595_at	1.01832	0.969282	-1.07316	0.873272	1.04818	0.913755
1368596_at	1.21054	0.718369	1.077	0.91167	1.263	0.641744
1368597_at	1.0643	0.877262	-1.06138	0.891324	1.068	0.869632
1368598_at	1.16655	0.501708	1.11727	0.680237	1.0314	0.921274
1368599_at	-1.06393	0.877739	1.07671	0.862495	-1.04837	0.91012
1368600_at	1.04815	0.921844	1.28383	0.502949	1.43018	0.222434
1368601_at	1.03722	0.906162	1.08918	0.769457	1.12887	0.624295
1368602_at	1.07658	0.790015	1.05118	0.875597	1.03646	0.908328
1368603_at	1.0137	0.99259	-1.20474	0.86717	-1.16628	0.88339
1368604_at	1.10351	0.771345	-1.05103	0.902955	1.03215	0.936283
1368605_at	1.06182	0.892251	-1.03201	0.949785	-1.09078	0.835305
1368606_at	1.13491	0.672811	1.06316	0.869072	1.04438	0.904658
1368607_at	-1.07923	0.98023	1.54997	0.873344	2.32839	0.708014
1368608_at	1.01076	0.983659	-1.04268	0.930431	-1.03367	0.941308
1368609_at	1.00691	0.984952	-1.04962	0.874331	-1.08869	0.740598
1368610_at	-1.09928	0.836879	-1.06534	0.903957	-1.02034	0.970256
1368611_at	1.04581	0.882739	1.04326	0.898152	1.02802	0.931932
1368612_at	-1.04619	0.941125	1.08941	0.889231	-1.18706	0.735843
1368613_at	-1.01731	0.940999	1.07101	0.738858	1.07457	0.701975
1368614_at	1.0402	0.910288	1.13997	0.666361	1.09658	0.763324
1368615_a_at	1.10444	0.725842	1.07585	0.819681	1.12438	0.664704
1368616_at	1.06352	0.80297	1.0554	0.844408	1.13456	0.545534
1368617_at	-1.04519	0.957022	-1.05254	0.952847	1.07802	0.925181
1368618_at	1.02069	0.968915	1.0382	0.943952	-1.09837	0.832927
1368619_at	-1.06172	0.862963	-1.03311	0.934558	-1.06435	0.855842
1368620_at	-1.09741	0.841184	-1.11553	0.820014	-1.23655	0.582766
1368621_at	1.06471	0.892701	1.02327	0.966329	-1.12835	0.771345
1368622_at	-1.279	0.869144	1.78698	0.668769	-1.29394	0.862965
1368623_at	1.01351	0.971685	1.16828	0.592086	1.0513	0.881586
1368624_at	1.01312	0.954444	1.03676	0.870639	1.01491	0.947613
1368625_at	1.01636	0.994674	2.6672	0.481926	1.03531	0.987178
1368626_at	-1.06175	0.806256	1.02698	0.928419	1.10634	0.642064
1368627_at	-1.0295	0.942254	-1.07591	0.851254	-1.13502	0.694204
1368628_at	1.02438	0.943824	1.05433	0.875229	1.02266	0.947778
1368629_at	-1.00065	0.998926	1.16132	0.630101	-1.06306	0.861346
1368630_at	1.06988	0.81714	1.099	0.750008	1.10817	0.702258
1368631_at	-1.04472	0.926835	1.06234	0.90273	-1.00783	0.989291
1368632_at	-1.3157	0.70709	-1.22812	0.803844	-1.17992	0.836879
1368633_at	1.02491	0.940034	1.08172	0.794458	1.02425	0.94143
1368634_at	1.04131	0.870041	1.14438	0.511002	1.03625	0.886214
1368635_at	1.09691	0.779133	1.1367	0.700614	1.08752	0.802691
1368636_at	1.03554	0.90923	-1.03467	0.91772	1.03855	0.901125
1368637_at	1.02385	0.944299	-1.03554	0.920694	-1.05793	0.854625
1368638_at	1.02127	0.935277	1.14132	0.506907	1.07924	0.718896
1368639_at	1.06927	0.813348	1.06513	0.839083	1.03587	0.910635
1368640_at	-1.00486	0.991886	1.08336	0.821872	1.04773	0.897284
1368641_at	-1.10046	0.915301	-1.12245	0.903116	-1.27851	0.750962
1368642_at	1.04809	0.933805	1.01942	0.977189	-1.31737	0.497524
1368643_at	-1.15239	0.865457	-1.33657	0.710995	-1.20343	0.813776
1368644_at	1.01402	0.977492	-1.10971	0.800941	-1.11808	0.768618
1368645_at	1.05906	0.840151	-1.00694	0.985942	-1.01705	0.95799
1368646_at	1.07067	0.897923	1.02949	0.962978	1.14362	0.778204
1368647_at	-1.00251	0.995064	-1.11485	0.674777	-1.06837	0.803667
1368648_at	1.01729	0.9549	-1.04749	0.875231	1.04509	0.873959
1368649_at	1.00403	0.996008	1.01192	0.988256	-1.08883	0.885921
1368650_at	-1.07525	0.921451	-1.07619	0.925999	-1.77428	0.194015
1368651_at	-1.2117	0.644888	-1.32453	0.487546	-1.88031	0.0314508
1368652_at	1.03095	0.869381	1.07842	0.651265	1.00406	0.986214
1368653_a_at	1.02083	0.911274	1.00516	0.982279	1.12915	0.314185
1368654_at	-1.02147	0.95799	1.02925	0.945969	-1.07807	0.830291
1368655_at	-1.03513	0.969809	-1.14742	0.871795	-1.23819	0.770759
1368656_at	-1.11929	0.847595	1.20932	0.737119	1.05889	0.928374
1368657_at	-1.01437	0.962039	1.04948	0.864116	1.08615	0.725842
1368658_at	1.11494	0.611634	-1.01754	0.954302	1.23295	0.205267
1368659_at	1.06193	0.897847	-1.16006	0.732391	-1.05076	0.917811
1368660_at	-1.0499	0.910836	-1.09197	0.837135	-1.00555	0.992377
1368661_at	1.19079	0.842811	1.15673	0.880364	-1.14184	0.883162
1368662_at	-1.04044	0.939061	1.18087	0.713155	1.10024	0.838153
1368663_at	1.03584	0.920687	1.06425	0.859999	-1.01568	0.967042
1368664_at	1.01386	0.978237	1.00505	0.993568	-1.07916	0.854952
1368665_at	1.02629	0.934984	1.06944	0.822303	1.15924	0.524268
1368666_a_at	1.02891	0.9345	-1.10792	0.739174	-1.05508	0.867932
1368667_at	1.09331	0.731026	-1.01732	0.960202	-1.0175	0.956441
1368668_at	1.04971	0.889854	1.25317	0.402491	1.47574	0.0559064
1368669_at	-1.1436	0.844624	-1.37925	0.597593	-1.38477	0.562524
1368670_a_at	1.09397	0.770545	1.11314	0.736599	1.00518	0.990632
1368671_at	-1.14772	0.762597	-1.20821	0.677435	-1.01471	0.980567
1368672_at	1.00547	0.997227	-1.24922	0.860918	-1.19336	0.88295
1368673_at	-1.07565	0.849857	1.09993	0.807131	1.00242	0.996429
1368674_at	1.03453	0.924563	-1.05786	0.874909	-1.09251	0.7731
1368675_at	1.10365	0.852717	1.12388	0.831802	1.07611	0.894119
1368676_at	-1.00731	0.986956	-1.10968	0.760772	-1.05703	0.875231
1368677_at	1.05338	0.875231	1.18551	0.541125	1.11695	0.700614
1368678_at	-1.02376	0.913752	1.02139	0.928195	-1.01203	0.95797
1368679_a_at	1.13955	0.65701	-1.01997	0.962184	1.05594	0.875231
1368680_a_at	1.04809	0.992381	-2.67752	0.776146	-1.37567	0.932769
1368681_at	1.02571	0.946722	1.18089	0.583396	1.07119	0.840349
1368682_at	1.02272	0.942116	1.06525	0.828515	-1.07566	0.782651
1368683_at	-1.22744	0.621266	-1.26458	0.586283	-1.23328	0.609021
1368684_at	1.02303	0.952114	1.06278	0.869637	1.06372	0.858256
1368685_at	-1.00716	0.988071	-1.0511	0.904497	-1.08543	0.816891
1368686_at	1.00816	0.957952	-1.02797	0.850833	-1.08853	0.408289
1368687_at	1.04725	0.877336	-1.07698	0.802691	1.08539	0.763324
1368688_at	1.05948	0.840899	1.18128	0.491259	1.14734	0.561314
1368689_at	1.08638	0.774748	1.07282	0.824806	1.06481	0.835897
1368690_a_at	1.02109	0.902681	1.04592	0.779275	-1.0224	0.895188
1368691_at	1.06517	0.812203	1.00976	0.97856	-1.02423	0.936925
1368692_a_at	1.20057	0.596069	1.16195	0.700042	1.16564	0.668085
1368693_at	-1.02171	0.973485	-1.139	0.81629	-1.04744	0.938166
1368694_at	-1.05894	0.824315	-1.00651	0.985825	-1.00274	0.994167
1368695_at	1.05695	0.91506	-1.00499	0.994674	-1.07706	0.881586
1368696_at	-1.12812	0.713114	1.00873	0.986113	-1.25691	0.399147
1368697_at	-1.04433	0.93176	1.24246	0.600713	1.04724	0.927311
1368698_at	1.12775	0.778143	-1.16343	0.730879	-1.03933	0.938091
1368699_at	1.09343	0.688675	1.13837	0.552322	1.16145	0.437608
1368700_at	-1.08	0.930575	-1.31418	0.725648	-1.278	0.739331
1368701_at	1.04919	0.863308	1.00788	0.983	1.04991	0.860918
1368702_at	-1.0265	0.947361	-1.05161	0.899936	1.09488	0.788641
1368703_at	1.11693	0.709024	1.21766	0.471936	1.23641	0.381969
1368704_a_at	1.03898	0.91395	1.10997	0.747682	1.13125	0.668992
1368705_at	1.04952	0.916029	-1.02701	0.959036	1.0052	0.993074
1368706_at	-1.06322	0.862856	-1.08577	0.817329	-1.04044	0.91506
1368707_at	1.002	0.992905	-1.02187	0.904861	1.10411	0.409657
1368708_a_at	1.06243	0.877262	1.13753	0.726938	1.14381	0.690097
1368709_at	-1.05592	0.940519	1.09231	0.906089	-1.24679	0.71039
1368710_at	-1.02558	0.93647	-1.09943	0.735988	-1.10397	0.70069
1368711_at	1.07636	0.862495	1.09505	0.83539	1.35809	0.286521
1368712_at	-1.00279	0.995921	-1.01051	0.984751	1.2225	0.527533
1368713_at	1.06454	0.88139	1.32551	0.379167	1.05905	0.892824
1368714_at	1.00016	0.999614	1.05869	0.808284	1.02804	0.910189
1368715_s_at	1.02779	0.895893	1.02077	0.929766	-1.01827	0.934129
1368716_at	-1.03685	0.878005	1.01487	0.957169	-1.0329	0.892829
1368717_at	-1.02481	0.960369	-1.12511	0.787225	-1.12477	0.771769
1368718_at	1.09142	0.789356	1.16333	0.626685	1.22143	0.454036
1368719_at	1.12191	0.766324	1.12581	0.774748	1.1533	0.698921
1368720_at	1.08498	0.963846	1.11887	0.951656	1.45796	0.801301
1368721_at	1.15179	0.60033	1.14286	0.648867	1.07615	0.811267
1368722_at	1.11312	0.693707	1.06085	0.857888	-1.0075	0.985014
1368723_at	-1.07536	0.900139	-1.04051	0.951519	-1.16652	0.763716
1368724_a_at	-3.44718	0.524675	-1.45714	0.886378	-1.04992	0.987665
1368725_at	-1.15913	0.88251	-1.29262	0.795926	-1.25493	0.808605
1368726_a_at	1.08367	0.528806	-1.02667	0.878801	1.10948	0.366148
1368727_at	1.00671	0.998238	1.2528	0.936447	-1.59673	0.847485
1368728_at	1.02531	0.966658	1.02363	0.971039	-1.06097	0.915301
1368729_a_at	1.03315	0.927765	1.14175	0.664478	1.05951	0.863577
1368730_a_at	1.11166	0.626563	-1.06651	0.804122	1.02978	0.914459
1368731_at	-1.12768	0.910849	-1.18016	0.880511	2.55076	0.134802
1368732_at	1.00535	0.992624	1.11292	0.797238	1.06749	0.876664
1368733_at	1.05709	0.928419	1.2495	0.671501	1.59664	0.204979
1368734_at	-1.27538	0.722981	-1.14634	0.867916	-1.12437	0.880168
1368735_a_at	1.04394	0.900113	1.00331	0.994674	-1.007	0.986723
1368736_at	1.07647	0.936182	1.02345	0.983781	1.00457	0.996853
1368737_at	1.0215	0.93665	1.07665	0.760359	1.06307	0.792433
1368738_at	1.02194	0.926512	1.03579	0.88139	1.12207	0.496195
1368739_s_at	1.00141	0.997132	1.13907	0.616904	-1.02497	0.938061
1368740_at	1.07164	0.789356	1.17617	0.476001	1.18077	0.420827
1368741_at	1.06925	0.910191	1.03397	0.9607	1.39338	0.435699
1368742_at	1.06244	0.897444	-1.19254	0.672704	-1.12927	0.771706
1368743_a_at	1.05518	0.829248	1.15278	0.510282	-1.00794	0.979426
1368744_a_at	1.00438	0.99113	1.0194	0.955307	1.02332	0.941783
1368745_at	1.04898	0.919391	-1.07886	0.874021	1.01743	0.973448
1368746_a_at	-1.01732	0.987178	-1.10155	0.918323	-1.07453	0.936535
1368747_at	1.08058	0.871706	1.2123	0.656004	1.26032	0.541738
1368748_at	1.10847	0.817493	1.1295	0.794987	1.26357	0.527693
1368749_at	-1.03748	0.897923	1.01754	0.957743	-1.01765	0.954444
1368750_a_at	1.01613	0.977146	1.04587	0.932828	1.02621	0.960451
1368751_at	-1.12018	0.82116	-1.09715	0.868917	1.00993	0.988401
1368752_at	1.11602	0.603476	-1.01609	0.957719	1.00022	0.999392
1368753_at	1.00143	0.997743	-1.02309	0.96422	-1.23599	0.526998
1368754_at	1.10493	0.627104	1.09743	0.680237	1.03373	0.895855
1368755_at	1.01386	0.982835	-1.07864	0.893976	-1.20249	0.678763
1368756_at	-1.02025	0.952823	1.03522	0.921535	1.03182	0.925181
1368757_at	1.15365	0.62088	1.16489	0.616904	1.06311	0.858893
1368758_a_at	1.02488	0.933418	1.07148	0.801129	-1.06426	0.809668
1368759_at	1.08516	0.791834	1.05709	0.875668	-1.00373	0.993568
1368760_at	1.16141	0.757772	1.14131	0.80372	1.13331	0.802256
1368761_at	-1.03	0.904095	1.00262	0.993976	-1.00819	0.976873
1368762_at	-1.0741	0.937114	1.62697	0.480027	1.02928	0.977146
1368763_at	1.10865	0.70905	1.13667	0.650241	1.14202	0.60662
1368764_at	1.03441	0.858787	1.02186	0.920008	1.10113	0.519716
1368765_at	1.05697	0.94649	1.06433	0.943462	-1.08513	0.918914
1368766_at	1.04956	0.85407	1.05898	0.833714	-1.01816	0.950206
1368767_at	1.01632	0.960111	1.07937	0.789847	1.0367	0.904861
1368768_at	1.14953	0.5725	1.2372	0.353725	1.21203	0.378555
1368769_at	1.12019	0.834084	1.12905	0.832521	1.26443	0.611226
1368770_at	1.02003	0.976872	-1.14422	0.815005	-1.03847	0.951656
1368771_at	-1.17148	0.647058	1.00681	0.990564	-1.15745	0.677142
1368772_at	-1.06851	0.850754	-1.09748	0.792598	-1.05929	0.871961
1368773_at	-1.04733	0.919739	-1.1619	0.712521	1.07572	0.866517
1368774_a_at	1.15679	0.802768	1.26051	0.684103	-1.04379	0.949427
1368775_at	-1.01272	0.970649	-1.08776	0.776213	1.06951	0.81321
1368776_at	-1.03979	0.921827	-1.28454	0.389964	-1.20205	0.534717
1368777_at	1.10614	0.735368	-1.1125	0.73663	1.01954	0.957952
1368778_at	1.02463	0.985916	1.07026	0.957734	-1.47741	0.676016
1368779_a_at	1.00361	0.997132	-1.10469	0.899268	-1.23427	0.744964
1368780_at	1.08381	0.77343	1.12037	0.68205	1.13545	0.611473
1368781_at	1.09842	0.823657	1.1671	0.708858	1.06074	0.896989
1368782_at	-1.03135	0.941667	1.08809	0.833811	-1.01339	0.97728
1368783_at	1.06421	0.877686	1.18329	0.638488	1.0782	0.84964
1368784_at	1.03232	0.958763	1.18429	0.751497	1.06618	0.912393
1368785_a_at	-1.70232	0.612974	-1.22554	0.881155	-1.58106	0.672811
1368786_a_at	1.10247	0.626892	1.1654	0.424858	1.15331	0.42734
1368787_at	1.14506	0.498955	1.15903	0.484266	-1.00273	0.993893
1368788_at	-1.01846	0.92441	1.09081	0.575415	-1.05623	0.733756
1368789_at	1.08898	0.817213	1.16126	0.673969	1.25869	0.427561
1368790_at	1.0567	0.891796	1.10697	0.796529	1.49366	0.0915964
1368791_at	1.0763	0.76857	1.13189	0.602501	1.18483	0.390759
1368792_at	1.07008	0.872425	1.0495	0.918215	1.01643	0.973216
1368793_at	1.12813	0.66612	1.08982	0.789356	1.00109	0.997743
1368794_at	1.05018	0.897246	1.11265	0.765285	1.01041	0.981687
1368795_at	1.18622	0.496817	1.26023	0.338702	1.14288	0.617199
1368796_at	1.00827	0.983334	1.06211	0.856232	1.08505	0.778391
1368797_at	1.10122	0.865774	-1.02318	0.973863	-1.13458	0.813726
1368798_at	1.10714	0.595727	1.01887	0.944997	-1.03147	0.897127
1368799_at	1.07318	0.908218	1.10595	0.872449	1.27493	0.616711
1368800_at	1.07403	0.765309	1.04472	0.875757	1.03822	0.887522
1368801_at	1.05493	0.838437	1.13961	0.57486	1.04804	0.861564
1368802_at	1.10902	0.714277	1.14984	0.622136	1.13493	0.635776
1368803_at	1.0332	0.923888	-1.05052	0.885232	1.03293	0.924563
1368804_at	1.0728	0.864116	1.24497	0.525389	1.08463	0.838541
1368805_at	1.03605	0.913755	1.15978	0.582971	1.08414	0.777719
1368806_at	-1.01292	0.905939	1.03785	0.701434	1.01143	0.917651
1368807_at	1.09418	0.622902	1.10624	0.597649	1.09759	0.60539
1368808_at	1.01907	0.967439	-1.00969	0.985956	-1.05676	0.895453
1368809_at	-1.0553	0.868072	-1.06693	0.849185	-1.12089	0.680963
1368810_a_at	-1.24485	0.811267	-1.2606	0.812241	-1.03094	0.97903
1368811_at	1.0587	0.882113	1.07462	0.858787	1.26037	0.409657
1368812_at	1.0451	0.916107	1.11495	0.781796	1.12414	0.745168
1368813_at	1.06285	0.906463	-1.06113	0.91506	-1.07028	0.894365
1368814_at	1.1984	0.653656	-1.03289	0.953114	1.36009	0.362709
1368815_at	-1.10989	0.884865	-1.15487	0.848228	1.02165	0.979969
1368816_at	-1.98846	0.650538	-1.98046	0.674926	-1.14835	0.942861
1368817_at	-1.05178	0.877387	-1.10537	0.749005	1.07367	0.817307
1368818_at	-1.19761	0.468227	-1.15305	0.616904	-1.04476	0.895112
1368819_at	-1.02983	0.940999	-1.08732	0.822819	-1.00956	0.983505
1368820_at	1.04351	0.909159	-1.1042	0.777696	1.00103	0.998085
1368821_at	-1.13176	0.902099	-1.26762	0.806342	-1.35733	0.721197
1368822_at	-1.2275	0.829524	-1.34975	0.75374	-1.44789	0.660907
1368823_at	1.01201	0.950504	-1.05869	0.735988	1.04862	0.770759
1368824_at	-1.2272	0.81949	1.02114	0.986936	-1.43698	0.648848
1368825_at	-1.00335	0.99113	-1.0101	0.970615	-1.06443	0.759534
1368826_at	1.17901	0.579123	1.17013	0.625274	1.36658	0.167588
1368827_at	1.04691	0.903248	1.15899	0.652448	1.05254	0.889749
1368828_at	1.02032	0.949056	-1.01565	0.964257	-1.05796	0.842403
1368829_at	-1.21659	0.736659	-1.17537	0.802903	-1.08052	0.909003
1368830_at	1.08201	0.78756	1.13342	0.659158	-1.05303	0.869295
1368831_at	-1.0024	0.992835	-1.02215	0.920601	-1.02115	0.918512
1368832_at	1.03333	0.946118	-1.14338	0.756239	-1.07742	0.867916
1368833_at	-1.09634	0.776861	-1.12337	0.727226	-1.08445	0.806342
1368834_at	-1.12529	0.873626	-1.13069	0.876438	-1.28329	0.698097
1368835_at	1.21834	0.684844	1.26574	0.63857	1.48742	0.300938
1368836_a_at	-1.02997	0.894045	1.03195	0.894024	1.00933	0.96988
1368837_at	1.03735	0.862284	-1.05596	0.795684	1.0411	0.846622
1368838_at	-1.07667	0.915955	-1.04997	0.949785	-1.07418	0.919144
1368839_at	1.19983	0.569115	1.14547	0.713712	1.24483	0.466114
1368840_at	1.07858	0.907294	-1.07914	0.912792	1.22134	0.714251
1368841_at	-1.30747	0.653022	-1.2349	0.754689	-1.50219	0.439435
1368842_at	-1.22377	0.758752	-1.29953	0.694647	-1.37489	0.587607
1368843_at	1.02797	0.903348	1.10101	0.618003	1.27956	0.0570643
1368844_at	1.0818	0.761193	1.1262	0.63711	1.34775	0.0786195
1368845_at	1.13774	0.455366	1.09619	0.652023	1.06851	0.744754
1368846_at	1.04227	0.892424	1.19374	0.466313	1.05492	0.856584
1368847_at	1.00561	0.98758	-1.00665	0.985942	1.13868	0.564438
1368848_at	1.12012	0.843652	1.23712	0.694647	1.43238	0.402491
1368849_at	1.06571	0.86912	1.03698	0.934402	1.20795	0.53611
1368850_at	1.08564	0.807471	1.16795	0.623373	1.11358	0.736547
1368851_at	1.01416	0.965991	-1.09135	0.75666	-1.08445	0.761305
1368852_at	1.03283	0.927511	1.01853	0.963366	1.16903	0.558462
1368853_at	1.05588	0.850754	1.0605	0.848529	1.17181	0.478661
1368854_at	-1.1687	0.802888	-1.0351	0.965735	1.02417	0.975442
1368855_at	1.07878	0.788871	-1.03831	0.911909	1.10784	0.699946
1368856_at	1.07702	0.82047	1.02034	0.960966	1.08341	0.803404
1368857_at	1.04302	0.892824	1.02439	0.945728	-1.01602	0.96301
1368858_at	1.03124	0.950118	-1.1134	0.812815	-1.09134	0.843699
1368859_at	1.07094	0.884271	1.05854	0.91339	1.15431	0.731158
1368860_at	1.05331	0.786834	1.0182	0.939325	1.01855	0.933805
1368861_a_at	1.04756	0.883453	1.00881	0.983341	1.05202	0.872769
1368862_at	-1.00749	0.986247	1.04512	0.90778	-1.08323	0.803143
1368863_at	-1.01925	0.958667	-1.16346	0.60221	-1.07139	0.827631
1368864_at	1.01676	0.930887	1.06759	0.691079	-1.00128	0.995921
1368865_at	1.16029	0.495568	1.02731	0.932775	1.08938	0.733017
1368866_at	-1.01189	0.98301	-1.04887	0.925764	-1.16004	0.704949
1368867_at	-1.15339	0.833901	-1.10085	0.901488	-1.36127	0.590473
1368868_at	1.04146	0.945818	-1.0767	0.903199	-1.02843	0.963846
1368869_at	-1.32811	0.810558	-1.53142	0.717516	-1.66553	0.62523
1368870_at	-1.08737	0.906609	-1.1521	0.842403	-1.30983	0.637478
1368871_at	1.02488	0.936463	-1.14048	0.60056	-1.17625	0.45578
1368872_a_at	1.02038	0.95161	1.01716	0.962985	1.50526	0.0247577
1368873_at	-1.08042	0.897753	1.00417	0.996047	-1.045	0.945104
1368874_a_at	1.09161	0.871172	-1.08313	0.891745	-1.11486	0.834169
1368875_a_at	1.16789	0.293431	1.08475	0.678763	1.05699	0.778973
1368876_a_at	1.1368	0.567191	1.09283	0.735368	1.13522	0.568225
1368877_at	1.12453	0.810517	-1.00916	0.989976	-1.12902	0.802785
1368878_at	1.04833	0.933735	1.1951	0.721197	1.00845	0.990314
1368879_a_at	1.0081	0.954798	1.05222	0.665732	1.02047	0.876549
1368880_at	1.03344	0.931853	1.03631	0.930887	-1.11435	0.736599
1368881_at	1.09131	0.838718	1.22204	0.603642	1.39187	0.258844
1368882_at	-1.09704	0.938483	-1.60957	0.628873	-1.47908	0.682864
1368883_at	-1.20532	0.705813	1.06459	0.921827	1.03583	0.954468
1368884_at	1.074	0.778143	1.23256	0.296686	1.11761	0.626025
1368885_at	-1.06473	0.926616	-1.1467	0.834203	-1.17154	0.78859
1368886_at	1.01191	0.964761	-1.0763	0.748318	-1.13662	0.483294
1368887_at	-1.06599	0.926205	1.06707	0.929511	-1.21351	0.736547
1368888_a_at	-1.17215	0.783738	-1.26736	0.678143	-1.19877	0.747464
1368889_at	1.16462	0.510282	1.23118	0.351396	1.3292	0.11245
1368890_at	1.02799	0.902604	-1.06567	0.762867	1.0399	0.855144
1368891_at	-1.06973	0.734496	-1.06077	0.786834	-1.04114	0.853607
1368892_at	1.02166	0.915394	1.03838	0.852394	1.01738	0.933334
1368893_at	-1.53051	0.60221	-1.45951	0.674926	-1.30159	0.770989
1368894_at	-1.92739	0.567453	-1.54813	0.747567	-1.23884	0.880785
1368895_at	1.03102	0.903135	1.16682	0.419667	1.12876	0.523439
1368896_at	1.0126	0.967246	-1.11206	0.664211	-1.24568	0.203638
1368897_at	1.11903	0.792494	-1.0414	0.938476	-1.07163	0.881127
1368898_at	1.03409	0.912674	1.01232	0.972429	-1.00255	0.995204
1368899_at	-1.02253	0.927765	-1.05479	0.817819	1.08877	0.664211
1368900_at	1.13431	0.70127	1.13151	0.728202	1.06195	0.873272
1368901_at	-1.14853	0.823652	1.02394	0.97728	-1.19562	0.763831
1368902_at	1.03053	0.928545	1.07461	0.820309	1.11955	0.674009
1368903_at	1.07217	0.699889	1.06389	0.755035	1.17495	0.232383
1368904_at	1.00562	0.979404	-1.02021	0.924048	-1.08693	0.575415
1368905_at	1.30634	0.656251	1.95891	0.154836	3.36954	0.00752904
1368906_at	-1.02756	0.915306	1.03	0.913755	1.12704	0.535814
1368907_at	1.17066	0.738238	1.30342	0.552031	1.43143	0.318622
1368908_at	1.03736	0.954795	1.14202	0.823996	-1.0798	0.899268
1368909_a_at	-1.09875	0.63711	-1.05592	0.821004	-1.17308	0.332736
1368910_at	1.01768	0.966617	-1.01465	0.974669	1.06446	0.866517
1368911_at	1.05684	0.904497	-1.02462	0.963366	1.00622	0.991535
1368912_at	-1.0054	0.989291	1.08636	0.784977	1.06596	0.828332
1368913_at	1.1199	0.545273	1.10836	0.617694	1.09223	0.656286
1368914_at	-1.08432	0.850012	-1.10958	0.810517	-1.223	0.564438
1368915_at	1.01335	0.980312	-1.18554	0.677435	-1.26624	0.494854
1368916_at	1.04729	0.94165	-1.02518	0.972099	-1.29613	0.585862
1368917_at	1.01835	0.933334	1.0023	0.993893	1.04069	0.84043
1368918_at	1.0274	0.914026	1.11203	0.613407	1.03904	0.873129
1368919_at	1.10271	0.637876	1.02657	0.925764	1.04272	0.865796
1368920_at	-1.16802	0.696138	1.00458	0.994674	-1.17706	0.676196
1368921_a_at	-1.16041	0.535969	-1.1077	0.71728	-1.00958	0.978859
1368922_at	1.11828	0.583396	1.1049	0.65802	1.14171	0.489264
1368923_at	1.11539	0.776083	1.09133	0.838863	1.12795	0.747682
1368924_at	1.1903	0.796861	1.12602	0.878248	1.32689	0.640341
1368925_a_at	-1.00704	0.982341	1.12858	0.590473	1.21041	0.267503
1368926_at	1.11606	0.619933	1.14594	0.543992	1.09516	0.69263
1368927_at	1.02517	0.939475	1.00349	0.993777	1.04856	0.876551
1368928_at	-1.03265	0.95603	-1.116	0.842403	1.03714	0.94966
1368929_at	1.04983	0.898879	1.0736	0.85665	1.01724	0.967622
1368930_at	-1.14939	0.912568	-1.44972	0.749005	-1.4347	0.738337
1368931_at	1.12222	0.808312	-1.0079	0.991272	1.02371	0.967237
1368932_at	1.17036	0.749282	1.16807	0.770122	1.24468	0.626685
1368933_at	-1.05223	0.876549	-1.08332	0.806094	-1.09027	0.772506
1368934_at	-1.11642	0.862271	-1.26578	0.684847	-1.36447	0.535969
1368935_at	1.11824	0.731818	1.13306	0.713983	1.1648	0.61061
1368936_at	1.0606	0.86681	1.19038	0.562286	1.38926	0.121039
1368937_at	1.02878	0.936294	1.18663	0.539281	1.20983	0.443965
1368938_at	1.04078	0.905066	-1.01809	0.96301	-1.01264	0.972974
1368939_a_at	-1.18036	0.641271	1.04398	0.92867	-1.03292	0.943557
1368940_at	-1.0908	0.876879	1.04973	0.939657	1.1508	0.785678
1368941_at	1.10698	0.741399	1.20977	0.498112	1.13652	0.659158
1368942_at	1.06331	0.866318	1.08566	0.823657	1.12472	0.713906
1368943_at	1.02331	0.962871	-1.38602	0.30741	-1.6568	0.0493371
1368944_at	1.04005	0.935632	-1.03427	0.948637	-1.04086	0.933999
1368945_at	-1.14068	0.763324	1.01636	0.978716	-1.39316	0.308915
1368946_at	-1.05492	0.865806	-1.02999	0.934984	1.02217	0.949037
1368947_at	1.07818	0.931533	1.31057	0.726843	1.4235	0.598165
1368948_at	-1.01052	0.985538	-1.13569	0.778435	-1.04996	0.920761
1368949_at	1.01654	0.985906	-1.03376	0.970259	1.00417	0.99662
1368950_a_at	1.07601	0.806776	1.23269	0.400989	1.09684	0.746528
1368951_at	1.03735	0.871036	1.07408	0.739174	1.06869	0.742598
1368952_at	-1.01658	0.963471	-1.02758	0.94072	1.04144	0.902847
1368953_at	1.08462	0.865796	1.20266	0.672704	1.59986	0.106854
1368954_at	-1.00848	0.981424	1.08399	0.782786	1.01058	0.97603
1368955_at	1.03616	0.921167	-1.0088	0.984631	1.00057	0.998968
1368956_at	-1.00598	0.982768	1.07361	0.739734	1.03101	0.894317
1368957_at	1.15418	0.670248	1.08516	0.840936	1.14826	0.680963
1368958_at	1.04569	0.947361	1.30742	0.626685	-1.06469	0.925295
1368959_at	-1.00655	0.984491	-1.02063	0.947208	-1.04688	0.863308
1368960_at	1.107	0.800416	1.22282	0.587971	1.42699	0.191326
1368961_at	-1.12845	0.674777	-1.10336	0.762515	-1.07113	0.829791
1368962_at	1.10631	0.695545	1.11822	0.678919	1.09964	0.715171
1368963_at	-1.02538	0.941807	-1.0299	0.935789	-1.09555	0.750946
1368964_at	-1.09205	0.910538	-1.27035	0.737705	-1.26989	0.717185
1368965_at	-1.16522	0.638139	-1.11596	0.771345	-1.12358	0.736017
1368966_at	-1.28825	0.678143	-1.08022	0.923801	-1.17299	0.810517
1368967_at	1.03228	0.928545	1.07971	0.818217	1.16409	0.569233
1368968_at	1.06451	0.823657	1.09798	0.740372	1.0643	0.823817
1368969_at	1.08355	0.772292	1.06311	0.846752	1.10215	0.713983
1368970_at	1.01474	0.962978	1.01177	0.972716	1.13935	0.561246
1368971_a_at	1.07022	0.851677	1.18615	0.593022	1.08277	0.81924
1368972_at	1.05606	0.830129	1.02645	0.931355	1.1713	0.421493
1368973_at	1.09903	0.787854	1.14098	0.708695	1.1809	0.587885
1368974_at	1.03821	0.880952	1.04098	0.880031	1.09355	0.673352
1368975_at	1.17312	0.821318	-1.00796	0.994196	1.10777	0.893028
1368976_at	1.11114	0.80666	1.18093	0.693951	1.18417	0.66395
1368977_a_at	1.22159	0.30741	1.04075	0.897722	1.51111	0.0177154
1368978_at	1.03792	0.879185	1.08435	0.724591	1.06802	0.767611
1368979_at	1.13605	0.705813	1.10892	0.785342	1.10549	0.776861
1368980_at	-1.17442	0.65903	-1.06224	0.897246	-1.09714	0.818508
1368981_at	-1.03499	0.931595	1.03691	0.932253	1.00113	0.997942
1368982_at	-1.11721	0.825132	-1.03024	0.962731	-1.15274	0.768347
1368983_at	-1.03816	0.909374	-1.01562	0.96759	-1.02725	0.936703
1368984_at	1.12736	0.789118	1.0104	0.987454	1.2842	0.501708
1368985_at	1.04446	0.883073	1.11532	0.686208	1.09316	0.735276
1368986_at	1.04781	0.857091	1.11834	0.627462	1.05604	0.826879
1368987_at	1.09828	0.735186	1.15932	0.580265	1.10926	0.70007
1368988_at	-2.31374	0.552322	-1.45946	0.834616	-1.2303	0.910278
1368989_at	1.03013	0.929335	-1.05122	0.881586	-1.03807	0.908722
1368990_at	1.41607	0.861346	2.30033	0.63932	9.06142	0.0627964
1368991_at	1.02207	0.985401	1.34525	0.745682	-1.26079	0.79457
1368992_a_at	1.00578	0.990919	-1.07136	0.863658	-1.04329	0.914734
1368993_at	-1.04788	0.897444	1.05076	0.897798	1.0245	0.949709
1368994_a_at	-1.13089	0.449067	-1.08804	0.661832	-1.06089	0.760772
1368995_at	1.01872	0.945045	1.04472	0.867916	-1.0523	0.828982
1368996_at	1.07064	0.81434	1.14559	0.616154	1.03427	0.917115
1368997_at	1.11239	0.714277	1.02114	0.956799	-1.01679	0.964126
1368998_at	-1.08915	0.894024	-1.06039	0.934515	1.0722	0.91506
1368999_a_at	-1.01919	0.965735	1.16163	0.674777	1.0457	0.913506
1369000_at	-1.02866	0.935655	1.09255	0.781001	-1.00692	0.986588
1369001_at	1.04326	0.909342	1.10162	0.782606	1.13842	0.670743
1369002_at	-1.07466	0.915881	-1.09444	0.899077	1.05788	0.936029
1369003_at	1.00477	0.994674	-1.0951	0.865806	-1.14189	0.774852
1369004_at	-1.00284	0.994674	1.02515	0.943253	-1.12267	0.651737
1369005_at	1.01847	0.962738	1.08065	0.824359	1.09409	0.776861
1369006_at	1.01807	0.947778	1.11695	0.619039	1.16164	0.421845
1369007_at	1.05993	0.827218	1.02517	0.937926	-1.04979	0.861346
1369008_a_at	-1.11569	0.943965	-1.34409	0.843652	-1.48062	0.764472
1369009_at	-1.04616	0.80901	-1.04262	0.838718	-1.1154	0.469588
1369010_at	1.04185	0.921344	-1.09028	0.827702	1.09819	0.797334
1369011_at	1.08836	0.897469	1.03892	0.960054	1.04582	0.948722
1369012_at	-1.26161	0.568729	-1.02645	0.965607	-1.6765	0.0852638
1369013_a_at	1.05653	0.773822	1.11386	0.537079	1.26168	0.0580237
1369014_at	1.18215	0.551672	1.24412	0.436961	1.0639	0.858787
1369015_at	1.12083	0.76857	1.14563	0.735186	1.05088	0.910221
1369016_at	-1.00846	0.981424	-1.03731	0.912014	-1.03847	0.902847
1369017_at	1.02163	0.942473	1.18688	0.43501	1.04699	0.866988
1369018_at	-1.01707	0.96638	1.03895	0.925636	1.04825	0.897771
1369019_at	1.0708	0.750962	1.14573	0.484892	1.15442	0.412526
1369020_at	1.04363	0.950504	1.30154	0.641951	1.15755	0.806197
1369021_at	1.09791	0.678837	1.1261	0.6052	1.00321	0.992905
1369022_at	1.09786	0.746725	1.10397	0.747567	1.06627	0.835828
1369023_at	1.09268	0.743497	1.0587	0.856872	1.17766	0.475466
1369024_at	1.07228	0.835828	-1.07926	0.82944	-1.0814	0.81068
1369025_at	1.00645	0.988594	-1.01417	0.97405	1.14731	0.640116
1369026_at	1.01047	0.975203	1.10398	0.713983	1.11399	0.658591
1369027_at	1.06831	0.95161	-1.08599	0.942879	-1.21319	0.843753
1369028_at	-1.02427	0.926402	1.01421	0.961106	1.00861	0.975937
1369029_at	-1.01695	0.98378	1.44869	0.495929	-1.08732	0.903062
1369030_at	-1.23947	0.933483	-1.35135	0.910437	-2.53424	0.645031
1369031_at	1.12785	0.770759	1.09733	0.842219	1.089	0.847364
1369032_at	1.09297	0.816166	1.13667	0.739734	1.18454	0.610741
1369033_at	-1.00829	0.965407	-1.00132	0.995921	1.00973	0.95887
1369034_at	1.06829	0.854952	1.01688	0.969867	-1.04743	0.902741
1369035_a_at	1.03662	0.936096	1.11687	0.78841	1.12286	0.759953
1369036_at	-1.09389	0.926638	-1.3074	0.763324	-1.21791	0.820296
1369037_at	1.06937	0.781431	1.09699	0.70405	1.06325	0.802505
1369038_at	1.1164	0.722421	1.18515	0.570641	1.06855	0.847195
1369039_at	1.01126	0.971217	-1.10324	0.70069	-1.09254	0.714247
1369040_at	1.09643	0.770759	1.08007	0.824423	1.27136	0.305001
1369041_at	-1.02167	0.924332	-1.02584	0.913755	1.04222	0.840019
1369042_at	1.08038	0.853607	1.01548	0.97728	-1.04795	0.9158
1369043_at	1.09834	0.684061	1.08688	0.744864	1.05434	0.838153
1369044_a_at	1.09259	0.858095	1.03908	0.947047	-1.27419	0.538138
1369045_at	1.06747	0.866822	1.04043	0.92859	1.02745	0.949037
1369046_at	1.14714	0.694134	1.22907	0.542966	-1.01725	0.970056
1369047_at	-1.00896	0.968735	-1.01354	0.954327	1.10535	0.524332
1369048_at	1.02587	0.913431	1.10124	0.626025	1.05575	0.794761
1369049_at	-1.01886	0.957743	1.02527	0.946088	-1.01903	0.957273
1369050_at	1.20317	0.811267	-1.30714	0.732242	-1.28204	0.735186
1369051_at	1.1914	0.724379	1.12874	0.831486	1.23605	0.652823
1369052_at	-1.17458	0.65291	-1.0414	0.932515	1.07567	0.862337
1369053_at	1.0833	0.684061	1.13077	0.518584	1.15983	0.359153
1369054_at	1.08384	0.842418	1.06843	0.881586	1.01968	0.96677
1369055_at	-1.00863	0.982766	1.04196	0.908422	-1.02867	0.935117
1369056_at	1.03481	0.877975	1.05072	0.825504	1.09911	0.603476
1369057_at	1.02982	0.940359	-1.11436	0.757772	-1.0414	0.915298
1369058_at	1.05834	0.838718	1.06675	0.823657	1.17899	0.445937
1369059_at	1.00229	0.995275	-1.16389	0.484359	-1.06134	0.811267
1369060_a_at	1.01227	0.939096	-1.01207	0.944333	1.05669	0.662055
1369061_at	1.21167	0.680963	1.28681	0.592715	1.74699	0.0850869
1369062_at	1.04996	0.886018	1.18731	0.549193	1.08388	0.798619
1369063_at	1.09974	0.701107	1.12903	0.626685	1.08268	0.756239
1369064_a_at	-1.01566	0.95161	1.07248	0.75793	1.03686	0.878248
1369065_a_at	-1.41281	0.605338	-1.28328	0.748014	-1.17649	0.83539
1369066_at	-1.03851	0.916327	-1.10571	0.763324	-1.0275	0.941396
1369067_at	1.05288	0.806	1.08399	0.696138	1.02852	0.903245
1369068_at	1.02062	0.945679	1.02855	0.928419	-1.00444	0.990031
1369069_at	1.09882	0.817267	-1.05184	0.916107	1.08271	0.851677
1369070_at	1.07343	0.800206	1.04501	0.892173	1.26604	0.222434
1369071_at	1.01544	0.955547	1.02063	0.943886	1.01084	0.969918
1369072_at	1.21002	0.756239	1.05188	0.948572	1.03457	0.964237
1369073_at	1.02623	0.973105	1.00441	0.996429	-1.00426	0.996381
1369074_at	-1.06903	0.677295	1.05098	0.786486	-1.08708	0.580503
1369075_a_at	-1.00172	0.997227	1.02606	0.953452	-1.04056	0.921117
1369076_at	1.03609	0.921344	1.10055	0.77152	1.39311	0.106769
1369077_at	1.12254	0.689876	1.12424	0.707007	1.10234	0.745682
1369078_at	1.0598	0.884775	-1.10785	0.795774	1.08206	0.83811
1369079_at	1.18271	0.495199	1.12587	0.681433	1.02625	0.939234
1369080_at	1.1186	0.716781	1.17638	0.593228	1.15036	0.628732
1369081_at	1.03466	0.960539	1.37232	0.543379	1.14291	0.818618
1369082_at	1.01615	0.959386	-1.06195	0.836028	1.04623	0.873301
1369083_at	1.17465	0.79457	-1.00872	0.992835	-1.14618	0.829111
1369084_a_at	-1.01103	0.965127	1.04149	0.864032	-1.04409	0.843122
1369085_s_at	1.22591	0.609715	-1.02958	0.959345	1.30739	0.463753
1369086_a_at	1.17601	0.771706	-1.02392	0.97486	1.22316	0.70436
1369087_at	1.05082	0.889089	1.08397	0.819326	1.24664	0.382991
1369088_at	1.27719	0.440593	1.23756	0.549193	1.33218	0.317534
1369089_at	1.00229	0.996739	1.06956	0.880243	-1.09091	0.825688
1369090_at	-1.04947	0.975446	1.82666	0.610741	1.04659	0.977396
1369091_at	-1.01248	0.977611	1.09658	0.802691	-1.01252	0.977482
1369092_at	1.01571	0.973595	-1.01362	0.979059	1.03827	0.931324
1369093_at	-1.0606	0.883453	-1.07417	0.866517	-1.18195	0.611634
1369094_a_at	1.13172	0.798142	1.30836	0.537079	1.35503	0.431205
1369095_at	-1.00548	0.984861	1.03704	0.881155	-1.00037	0.998987
1369096_at	1.08408	0.822449	1.06334	0.879341	1.05862	0.881155
1369097_s_at	-1.02476	0.915955	-1.05816	0.797266	-1.03685	0.870372
1369098_at	-1.1919	0.735186	-1.16012	0.796331	-1.11229	0.852359
1369099_at	1.09955	0.86912	1.00255	0.99746	1.13684	0.812414
1369100_at	-1.02269	0.986858	1.46457	0.703478	-1.13868	0.907943
1369101_at	1.03902	0.944694	-1.00452	0.995427	1.14212	0.776146
1369102_at	-1.10089	0.777332	-1.05363	0.897002	-1.01608	0.969809
1369103_at	-1.04833	0.932984	-1.11237	0.847024	-1.36878	0.418087
1369104_at	1.01361	0.977218	-1.08804	0.835954	-1.01044	0.983222
1369105_a_at	1.00261	0.996646	-1.08925	0.863585	-1.07966	0.869994
1369106_at	-1.00746	0.978699	-1.01353	0.961498	-1.14625	0.431398
1369107_at	-1.15011	0.750047	-1.17199	0.73055	-1.13428	0.777592
1369108_at	-1.30128	0.69992	-1.18065	0.835897	1.00405	0.997006
1369109_at	1.0881	0.678763	-1.00178	0.995921	1.10122	0.62366
1369110_x_at	1.10053	0.813495	1.20494	0.62414	1.01927	0.968868
1369111_at	-1.10472	0.611263	-1.11702	0.59008	-1.12971	0.505368
1369112_at	1.01104	0.957471	1.02754	0.894108	1.07174	0.662797
1369113_at	-1.19137	0.942781	1.18676	0.947613	-1.40365	0.88139
1369114_at	-1.03568	0.883073	1.00277	0.993738	1.01558	0.952138
1369115_at	1.06908	0.938208	-1.07003	0.941308	1.02721	0.977659
1369116_a_at	1.11996	0.657596	1.22687	0.3758	1.17075	0.495568
1369117_at	1.04938	0.859656	1.109	0.678819	-1.02701	0.927305
1369118_a_at	1.08843	0.581519	1.12577	0.429621	1.09095	0.565451
1369119_a_at	1.02238	0.948443	1.02173	0.953039	1.03255	0.924332
1369120_a_at	1.14534	0.613661	1.10605	0.745682	1.1306	0.654273
1369121_at	1.07395	0.81764	1.14682	0.638256	1.17253	0.537079
1369122_at	-1.04601	0.838131	1.05298	0.821855	-1.01193	0.962978
1369123_a_at	1.03676	0.934129	-1.01484	0.97728	-1.10662	0.78841
1369124_at	1.08176	0.740789	1.04839	0.866511	1.08195	0.738787
1369125_at	-1.04225	0.818407	1.01374	0.950504	1.03347	0.862495
1369126_at	-1.08421	0.874831	1.04816	0.936029	-1.04157	0.94072
1369127_a_at	1.11251	0.798691	1.0751	0.879467	1.08602	0.850899
1369128_at	1.02042	0.974443	-1.0554	0.931077	-1.17025	0.749412
1369129_at	-1.01557	0.951656	1.17791	0.358774	1.10243	0.613677
1369130_at	1.13155	0.701344	1.16428	0.643571	1.11909	0.732621
1369131_at	1.08117	0.82492	1.08984	0.817329	1.04189	0.915785
1369132_at	1.15872	0.750816	1.14348	0.79182	1.17108	0.728808
1369133_a_at	1.01315	0.941946	1.05593	0.73011	1.04119	0.794618
1369134_x_at	-1.10318	0.583363	-1.00255	0.993776	1.03718	0.867743
1369135_at	1.08853	0.813776	1.02626	0.95355	1.18233	0.590336
1369136_at	1.7193	0.674452	6.98837	0.0436502	16.9352	0.00610463
1369137_at	1.08809	0.744181	1.05702	0.854061	1.04425	0.880859
1369138_a_at	1.07401	0.817373	1.02976	0.937479	1.13235	0.652823
1369139_at	1.09855	0.655007	1.0936	0.696138	1.04906	0.842811
1369140_at	1.01873	0.957942	-1.03032	0.934871	1.02754	0.936661
1369141_at	1.04992	0.898435	1.02111	0.962907	1.06181	0.871961
1369142_at	1.03193	0.909659	-1.0258	0.932949	-1.01537	0.958746
1369143_at	1.00608	0.985388	1.03718	0.897847	1.01419	0.96158
1369144_a_at	-1.12428	0.876337	1.04614	0.959685	-1.12533	0.874909
1369145_a_at	1.05563	0.850012	1.163	0.537057	1.06981	0.803667
1369146_a_at	1.25051	0.821904	2.18234	0.30741	2.2261	0.243459
1369147_at	1.15985	0.701391	1.25488	0.543379	1.19815	0.621661
1369148_at	1.00187	0.995921	1.10869	0.669979	-1.01098	0.971187
1369149_at	1.00782	0.982482	1.10701	0.704928	1.02563	0.935075
1369150_at	1.10857	0.793708	1.1957	0.633203	1.16515	0.672258
1369151_at	-1.63715	0.70007	-1.2283	0.897484	-1.2733	0.868769
1369152_at	1.20662	0.770487	1.1111	0.889089	1.2443	0.724591
1369153_at	1.02585	0.993103	-1.74651	0.796563	-1.5537	0.833621
1369154_at	-1.03009	0.951656	-1.18613	0.678059	-1.00066	0.999285
1369155_at	-1.03844	0.834084	1.04059	0.83545	1.00798	0.970056
1369156_at	1.21528	0.606115	-1.10328	0.834124	1.12387	0.781658
1369157_at	1.12776	0.82296	1.20434	0.728051	1.74296	0.104449
1369158_at	-1.07517	0.961808	-1.48673	0.761014	-1.58261	0.693345
1369159_at	-1.01188	0.973485	-1.02172	0.951747	-1.08031	0.785692
1369160_a_at	-1.09862	0.860918	-1.05846	0.926311	-1.23397	0.640157
1369161_at	1.15579	0.699946	1.12821	0.773896	1.13339	0.745682
1369162_at	1.02051	0.987862	1.96545	0.415049	1.65408	0.547165
1369163_at	1.06158	0.835897	1.1617	0.555173	1.01949	0.952587
1369164_a_at	1.00335	0.990366	1.12231	0.510282	1.05511	0.783028
1369165_at	1.16752	0.66249	1.04734	0.92149	1.08829	0.832261
1369166_at	-1.06416	0.951747	-1.21521	0.843336	-1.30399	0.756432
1369167_at	-1.05495	0.871287	-1.08311	0.808832	-1.03511	0.921387
1369168_a_at	-1.01189	0.964935	1.00842	0.978219	1.05898	0.79792
1369169_at	1.02949	0.945735	1.11075	0.785958	1.4537	0.11503
1369170_at	1.09663	0.705813	1.18153	0.459551	1.05161	0.855132
1369171_at	1.08783	0.874345	-1.03011	0.962978	1.02618	0.965407
1369172_at	-1.03884	0.893845	1.02937	0.926917	1.03309	0.910631
1369173_at	-1.00316	0.995384	1.03506	0.936096	1.06296	0.871036
1369174_at	-1.07898	0.803867	-1.1104	0.736425	-1.23382	0.368375
1369175_a_at	1.04124	0.888514	1.1882	0.453101	1.17519	0.452759
1369176_at	1.11416	0.609407	1.19793	0.347158	1.19347	0.309698
1369177_at	-1.00449	0.994196	-1.04497	0.93136	1.05027	0.916996
1369178_a_at	1.00582	0.993789	-1.06957	0.911045	-1.00785	0.99134
1369179_a_at	-1.01927	0.960685	1.043	0.913373	-1.00629	0.988869
1369180_at	1.04165	0.915881	1.1607	0.653697	1.03554	0.929511
1369181_at	1.10959	0.871706	-1.04704	0.950657	1.01799	0.981842
1369182_at	-1.09005	0.855968	-1.09458	0.858276	-1.13287	0.776861
1369183_at	-1.04794	0.930267	1.20469	0.682887	-1.08199	0.874909
1369184_at	1.0717	0.962349	-1.15393	0.92196	-1.20196	0.888695
1369185_a_at	-1.02255	0.93136	1.00733	0.981424	1.08175	0.711652
1369186_at	1.07152	0.932237	1.36476	0.648204	1.07544	0.928604
1369187_a_at	1.0445	0.801626	1.18013	0.190594	1.10151	0.496209
1369188_at	1.11313	0.701975	1.05104	0.884618	1.06921	0.826354
1369189_at	1.14367	0.639895	1.14212	0.668309	1.15191	0.615909
1369190_at	1.02151	0.942761	1.12999	0.611634	1.00126	0.997227
1369191_at	1.06119	0.825132	1.10954	0.688932	1.10394	0.683805
1369192_at	1.00817	0.98109	1.05264	0.864116	-1.15446	0.51229
1369193_at	1.01573	0.964126	1.18193	0.517593	1.07084	0.814316
1369194_a_at	1.041	0.886541	1.04504	0.882469	-1.01887	0.950751
1369195_at	-1.04272	0.981019	2.68202	0.3758	1.21307	0.896733
1369196_at	1.07089	0.702982	1.34472	0.0254359	1.15475	0.302023
1369197_at	1.0564	0.862518	-1.0301	0.934871	-1.10919	0.709234
1369198_at	1.07466	0.693707	1.16054	0.345811	1.02415	0.913755
1369199_at	1.0634	0.769299	1.11034	0.598332	1.03122	0.895453
1369200_at	1.06486	0.927336	1.05499	0.942746	1.1122	0.86912
1369201_at	-1.02615	0.922645	1.03082	0.913556	-1.03307	0.89909
1369202_at	-1.08088	0.959345	1.34355	0.833714	1.23115	0.880292
1369203_at	-1.28307	0.724591	-1.22809	0.794569	-1.21505	0.791971
1369204_at	1.11928	0.844582	1.02976	0.966869	-1.00116	0.998787
1369205_at	-1.01036	0.971233	1.00023	0.999401	1.01075	0.970446
1369206_at	-1.00546	0.985	-1.02348	0.928545	1.05369	0.80666
1369207_at	1.03186	0.937474	1.09243	0.812262	1.20569	0.520742
1369208_at	1.00037	0.999293	1.20559	0.421845	1.17208	0.480388
1369209_at	1.06639	0.834848	1.00988	0.981019	-1.0531	0.871283
1369210_at	-1.06548	0.825504	1.011	0.97728	1.01185	0.972853
1369211_at	1.05964	0.892173	1.02741	0.955638	-1.00453	0.993777
1369212_s_at	1.04579	0.901271	-1.08059	0.826573	1.00454	0.99259
1369213_at	1.06425	0.913755	1.04477	0.945104	1.09086	0.874345
1369214_a_at	1.07643	0.81905	1.10844	0.752488	1.1519	0.613234
1369215_a_at	-1.29272	0.719159	-1.1643	0.858293	-1.42963	0.585852
1369216_a_at	1.00841	0.981019	1.07109	0.813128	1.15023	0.541738
1369217_at	1.02156	0.952114	1.07833	0.819253	1.01994	0.95612
1369218_at	1.22517	0.713712	1.11716	0.867969	1.36661	0.526006
1369219_at	1.24537	0.530594	1.32017	0.429621	1.20763	0.601517
1369220_at	1.1451	0.665732	1.07803	0.84429	1.34642	0.204979
1369221_at	-1.0318	0.908422	1.04271	0.881326	1.04291	0.872478
1369222_at	1.08845	0.744754	1.12869	0.636918	1.13609	0.585852
1369223_at	1.03635	0.903245	1.08407	0.770528	1.04361	0.881147
1369224_at	1.12695	0.955662	3.47045	0.427078	1.08321	0.971233
1369225_at	1.03556	0.919059	-1.00365	0.993914	1.04581	0.893612
1369226_at	1.07689	0.902548	-1.06885	0.918323	1.00745	0.992624
1369227_at	1.07368	0.845635	1.01634	0.971208	1.06224	0.871137
1369228_at	1.0838	0.816913	1.18709	0.590473	1.17379	0.592347
1369229_at	1.04018	0.931335	1.12559	0.776861	1.09705	0.818234
1369230_at	1.05456	0.852359	-1.02367	0.943965	1.01042	0.97539
1369231_at	1.15882	0.627359	1.19876	0.563393	1.16105	0.62182
1369232_at	1.12788	0.66369	1.06241	0.859772	1.13944	0.626685
1369233_at	-1.0378	0.866381	1.04606	0.844564	-1.00266	0.993074
1369234_at	1.05697	0.930593	-1.04739	0.946081	-1.06574	0.918713
1369235_at	-1.00833	0.975446	-1.04931	0.841093	-1.08817	0.668769
1369236_at	-1.01312	0.974371	-1.07541	0.841209	-1.09826	0.770532
1369237_at	1.01483	0.946482	1.03617	0.86912	1.00146	0.995921
1369238_at	-1.16302	0.903492	1.13312	0.926981	-1.05113	0.97076
1369239_at	1.13534	0.510282	1.10794	0.639528	1.04884	0.842403
1369240_a_at	-1.04407	0.917101	-1	0.999993	-1.05751	0.888705
1369241_at	-1.00535	0.989817	-1.0045	0.992523	1.08934	0.770923
1369242_at	1.02328	0.940999	1.03715	0.909374	-1.03177	0.918185
1369243_at	-1.04214	0.911294	-1.01164	0.979332	1.03066	0.93653
1369244_at	1.12824	0.711662	1.1204	0.749065	-1.00446	0.993074
1369245_at	1.05769	0.845553	1.19164	0.459749	1.0946	0.728454
1369246_a_at	1.09416	0.602933	1.08455	0.670193	1.03686	0.862833
1369247_at	-1.00421	0.995731	-1.17669	0.757261	-1.26181	0.603551
1369248_a_at	-1.01571	0.982766	1.04013	0.954327	1.0416	0.949037
1369249_at	1.13678	0.754545	1.08558	0.864377	1.08016	0.864365
1369250_at	1.13261	0.510607	1.10631	0.638428	1.06646	0.77132
1369251_a_at	1.03444	0.909104	1.01726	0.959874	-1.00802	0.981718
1369252_a_at	1.04937	0.875307	1.08626	0.783028	1.11878	0.666402
1369253_at	1.07341	0.781591	1.05033	0.867772	1.03392	0.907919
1369254_a_at	1.03572	0.90545	-1.09043	0.751851	1.02817	0.927097
1369255_at	1.10177	0.857645	1.1477	0.800013	1.15104	0.778536
1369256_at	1.08637	0.827399	1.08941	0.834084	1.04369	0.918436
1369257_at	1.11751	0.723927	1.13658	0.694647	1.15965	0.610287
1369258_at	-1.00423	0.989041	1.04152	0.872746	-1.01046	0.969329
1369259_at	-1.08334	0.923779	-1.14061	0.874909	-1.41186	0.587594
1369260_a_at	1.00084	0.99765	1.12848	0.514042	1.01912	0.936773
1369261_at	1.0422	0.836789	1.14124	0.420024	-1.07887	0.666621
1369262_at	1.17926	0.520742	1.09815	0.768051	1.15314	0.590473
1369263_at	-1.01576	0.955089	-1.06051	0.817329	-1.07393	0.755035
1369264_at	1.08822	0.814433	1.13995	0.713983	1.07245	0.852684
1369265_at	1.09108	0.85959	1.03633	0.95027	1.21297	0.641271
1369266_at	1.13471	0.881742	-1.09394	0.925764	-1.12188	0.894498
1369267_at	-1.00662	0.984461	1.02835	0.926981	-1.02716	0.925764
1369268_at	-1.14083	0.802013	1.0196	0.978244	1.088	0.881155
1369269_at	1.17678	0.655018	1.07839	0.868769	1.45605	0.160127
1369270_at	1.14482	0.775834	1.19228	0.715171	1.18312	0.70966
1369271_at	1.04522	0.872849	1.15664	0.528147	1.04056	0.885757
1369272_at	1.10896	0.883027	-1.05273	0.949477	1.01287	0.988624
1369273_a_at	-1.00343	0.992076	1.08461	0.735333	-1.03557	0.892466
1369274_a_at	1.14614	0.417937	1.12848	0.523439	1.16545	0.326144
1369275_s_at	1.03607	0.950091	1.49112	0.293431	1.52932	0.203638
1369276_at	1.02222	0.946349	1.04439	0.895188	1.03095	0.924995
1369277_at	1.01686	0.973461	1.08394	0.860918	1.04808	0.918024
1369278_at	1.10249	0.857221	-1.03042	0.963576	1.04678	0.937926
1369279_at	1.00818	0.985388	1.12229	0.728051	1.08279	0.808938
1369280_at	1.0177	0.968736	1.00987	0.98537	1.02879	0.947133
1369281_at	1.04061	0.892588	1.15396	0.561314	1.09036	0.736467
1369282_at	1.02154	0.940646	1.18148	0.431453	1.08989	0.712561
1369283_at	-1.00886	0.967439	-1.01618	0.94165	1.029	0.881666
1369284_at	1.00498	0.98968	1.00421	0.992164	-1.02416	0.939834
1369285_at	1.0617	0.85008	1.1652	0.582971	1.18221	0.498356
1369286_at	1.04833	0.903135	-1.02104	0.962985	-1.08992	0.806
1369287_at	1.0543	0.868011	1.1688	0.56792	1.12306	0.668769
1369288_at	-1.11047	0.780818	-1.0797	0.858893	-1.13995	0.71483
1369289_at	1.13079	0.787774	1.05787	0.918323	1.06376	0.90331
1369290_at	1.21149	0.661961	-1.02876	0.963361	-1.03788	0.94679
1369291_at	1.16924	0.766518	1.01986	0.978666	1.00566	0.994371
1369292_at	1.00668	0.985505	-1.06553	0.83182	-1.15835	0.520569
1369293_at	1.0547	0.812852	1.06568	0.78722	1.09622	0.646821
1369294_at	1.05175	0.921827	-1.05402	0.924238	-1.01612	0.978153
1369295_at	-1.0309	0.934249	-1.15651	0.633344	-1.30145	0.243485
1369296_at	1.29372	0.734571	1.0593	0.953144	1.93194	0.233862
1369297_at	1.02691	0.9325	1.05166	0.871961	1.00173	0.996516
1369298_at	1.0262	0.937854	1.01928	0.95797	-1.06008	0.847803
1369299_at	-1.00134	0.997295	1.04625	0.889854	-1.04914	0.874295
1369300_at	1.10007	0.684061	1.1626	0.500689	1.09088	0.715911
1369301_at	1.14116	0.614504	-1.00178	0.99692	1.03373	0.921279
1369302_at	1.02738	0.940519	1.01578	0.969356	1.00873	0.983424
1369303_at	1.05806	0.70436	1.05286	0.752289	1.03897	0.810517
1369304_at	1.13378	0.652519	1.28031	0.302023	1.36468	0.11503
1369305_at	1.00697	0.994196	-1.15071	0.847449	-1.1323	0.856769
1369306_at	1.22534	0.783426	1.38768	0.646758	1.10794	0.901271
1369307_at	-1.04418	0.859527	-1.05001	0.849939	-1.08439	0.705477
1369308_at	-1.00203	0.997132	1.05326	0.908422	-1.04669	0.914772
1369309_a_at	1.09783	0.735333	1.28085	0.259639	1.12188	0.65953
1369310_at	-1.17622	0.830563	-1.0613	0.948303	-1.3054	0.699323
1369311_at	1.05474	0.802718	1.1164	0.57486	1.06186	0.773935
1369312_a_at	1.03083	0.942913	-1.06476	0.881619	1.01329	0.977577
1369313_at	1.05186	0.964865	-1.06102	0.961448	-1.15569	0.889089
1369314_at	1.14565	0.624365	1.13074	0.687643	1.00493	0.991199
1369315_at	-1.02944	0.942622	1.01024	0.98357	1.01062	0.981424
1369316_s_at	-1.00001	0.999982	1.04525	0.905171	1.03325	0.927336
1369317_at	1.03401	0.885376	1.11811	0.574876	1.11309	0.564438
1369318_at	1.09799	0.795926	1.12522	0.750384	1.04286	0.91772
1369319_at	-1.03586	0.938622	-1.01457	0.978716	-1.05566	0.902642
1369320_at	1.01138	0.972131	1.0383	0.905066	1.05101	0.860918
1369321_s_at	1.12949	0.237517	1.15665	0.162904	1.11071	0.328643
1369322_at	1.07603	0.800018	1.06082	0.855764	1.04393	0.890941
1369323_at	-1.06869	0.871126	-1.05474	0.906064	-1.17838	0.626685
1369324_at	1.03523	0.892308	1.04958	0.853765	-1.04166	0.870157
1369325_at	1.22828	0.525581	1.13584	0.744992	1.10374	0.795926
1369326_at	-1.0195	0.956429	1.01317	0.973784	1.13931	0.625864
1369327_at	1.03974	0.915394	1.09943	0.782788	1.02417	0.949942
1369328_at	1.07925	0.789847	1.03813	0.913506	1.14517	0.588902
1369329_at	1.05245	0.875392	1.05011	0.889089	-1.06718	0.835828
1369330_at	-1.01787	0.92148	1.07873	0.610097	1.02027	0.90925
1369331_a_at	1.05175	0.904658	-1.08538	0.847319	-1.00502	0.992829
1369332_a_at	1.10704	0.580299	1.07471	0.73663	1.12648	0.491829
1369333_a_at	1.04035	0.866635	1.04373	0.864116	1.0218	0.931595
1369334_at	1.0997	0.737662	1.15072	0.613234	1.09401	0.752879
1369335_at	-1.00319	0.990314	1.08624	0.644862	1.02977	0.884558
1369336_at	1.00947	0.979687	1.01663	0.964853	1.06302	0.840911
1369337_at	1.23378	0.797858	1.05574	0.957952	1.79773	0.333955
1369338_at	1.03106	0.906133	1.02441	0.932253	1.00011	0.999751
1369339_at	1.03805	0.884586	1.02065	0.94506	1.0333	0.901397
1369340_at	1.03016	0.922966	1.10599	0.708858	1.01121	0.973461
1369341_a_at	1.07121	0.767266	1.09491	0.700043	1.06173	0.800582
1369342_at	-1.22897	0.79752	1.01982	0.986521	-1.44496	0.6009
1369343_at	-1.02787	0.948037	1.05181	0.906285	-1.05337	0.895893
1369344_at	-1.02544	0.938228	-1.02401	0.945969	-1.0568	0.853137
1369345_at	-1.02288	0.956575	1.02346	0.958702	1.00353	0.994674
1369346_at	1.00419	0.988594	-1.00502	0.987059	1.06966	0.742107
1369347_s_at	-1.09444	0.843336	-1.03476	0.949524	1.04953	0.9222
1369348_at	1.08312	0.817221	1.05212	0.898495	1.08985	0.801149
1369349_a_at	1.02743	0.903062	-1.0025	0.993721	1.101	0.578033
1369350_at	1.1126	0.574442	1.04867	0.845453	1.13392	0.481926
1369351_at	1.07953	0.631772	1.0259	0.903545	1.01002	0.962985
1369352_at	-1.0022	0.995921	-1.04275	0.904643	1.01445	0.967945
1369353_at	1.07348	0.797277	1.03512	0.916539	1.06995	0.807521
1369354_at	1.0115	0.943858	1.09427	0.455937	1.02614	0.862992
1369355_at	1.1436	0.717573	1.06951	0.881525	1.06651	0.878961
1369356_at	-1.01373	0.963464	1.04087	0.888705	1.10276	0.664211
1369357_at	1.0095	0.979426	1.03335	0.926432	1.01189	0.973784
1369358_a_at	1.00285	0.992598	1.04331	0.855889	-1.04313	0.846542
1369359_at	1.10591	0.827141	1.21465	0.655007	1.1335	0.777655
1369360_at	1.02438	0.949446	-1.01603	0.970113	-1.00184	0.99692
1369361_at	1.08833	0.911827	-1.13404	0.871329	-1.05215	0.949037
1369362_at	1.03821	0.949037	1.14935	0.794705	1.22197	0.661005
1369363_at	-1.03755	0.936192	-1.06722	0.888358	-1.05585	0.902923
1369364_at	1.06693	0.812983	1.06902	0.820014	1.08452	0.757821
1369365_at	1.06357	0.756836	-1.05705	0.800013	-1.0263	0.909374
1369366_at	1.07101	0.842403	1.07265	0.849939	1.09669	0.776204
1369367_at	-1.00854	0.986588	1.07445	0.866882	1.00776	0.987916
1369368_at	1.03571	0.882469	1.17243	0.384027	1.01416	0.95678
1369369_at	1.10188	0.547852	1.12912	0.455896	1.32602	0.021116
1369370_s_at	1.08835	0.829146	-1.13948	0.738243	-1.09981	0.803867
1369371_a_at	1.058	0.86047	1.03069	0.934511	1.09171	0.764472
1369372_at	1.08587	0.692347	1.14812	0.480453	1.10587	0.609881
1369373_at	1.09851	0.770532	-1.15154	0.654099	-1.13266	0.678012
1369374_at	1.03557	0.882469	1.071	0.764326	1.11168	0.579133
1369375_a_at	-1.2706	0.891234	1.99713	0.654643	-1.18855	0.925197
1369376_a_at	1.05622	0.856045	1.05276	0.874622	1.06611	0.82492
1369377_at	1.07591	0.813058	1.01167	0.978019	1.03536	0.92024
1369378_at	1.10735	0.698961	1.14867	0.597228	1.06971	0.811822
1369379_at	-1.09084	0.78841	-1.07781	0.834124	-1.01005	0.981252
1369380_at	-1.03919	0.94536	-1.08386	0.883534	1.08856	0.869072
1369381_a_at	1.08834	0.949332	1.1243	0.933172	-1.17157	0.900412
1369382_at	1.10972	0.845347	1.02888	0.965222	-1.03206	0.957952
1369383_a_at	1.11414	0.753971	1.07788	0.850986	1.12712	0.722836
1369384_at	1.09539	0.764848	1.07653	0.827605	1.07554	0.817213
1369385_at	1.09583	0.566973	1.06865	0.720013	-1.00439	0.985942
1369386_at	-1.05375	0.842403	1.05869	0.837544	-1.12884	0.579123
1369387_at	1.09749	0.867915	-1.04376	0.947127	-1.07005	0.90737
1369388_at	1.11791	0.750474	1.01249	0.979865	1.12586	0.732084
1369389_at	1.09114	0.801796	1.08242	0.83532	1.07426	0.842939
1369390_a_at	-1.06024	0.815148	-1.07835	0.770653	-1.0127	0.966307
1369391_at	-1.01442	0.965735	-1.03901	0.906865	-1.00161	0.996744
1369392_at	1.06633	0.849939	1.13367	0.692162	1.12632	0.688533
1369393_at	1.15213	0.805371	1.00539	0.995487	1.14281	0.817267
1369394_at	1.00592	0.987514	1.04563	0.888705	1.07199	0.801301
1369395_at	-1.01779	0.93647	1.04209	0.849179	1.02808	0.895727
1369396_at	1.02826	0.875697	1.0533	0.763324	1.06745	0.665625
1369397_at	1.05332	0.908422	1.20896	0.620406	1.12214	0.771706
1369398_at	-1.01726	0.993893	2.35548	0.527223	-1.1196	0.948694
1369399_at	-1.23361	0.791038	-1.43558	0.631142	-1.36289	0.669791
1369400_a_at	1.13319	0.622902	1.1828	0.50554	1.09152	0.750012
1369401_at	1.1176	0.939774	-1.2179	0.895112	-1.28097	0.854603
1369402_at	1.1348	0.657165	1.02455	0.950091	1.11109	0.722438
1369403_at	1.0606	0.831934	1.10025	0.726034	1.04009	0.894108
1369404_a_at	1.00663	0.983422	1.18261	0.401936	1.15645	0.452759
1369405_a_at	-1.04248	0.88251	1.04721	0.877862	-1.01089	0.973485
1369406_at	1.01307	0.978244	1.21604	0.567191	1.28444	0.38331
1369407_at	-1.14381	0.796529	-1.02575	0.970042	1.1207	0.830466
1369408_at	1.05872	0.871309	1.02564	0.950424	1.12422	0.703025
1369409_at	1.23098	0.626685	1.10392	0.854952	1.02883	0.960422
1369410_at	1.2715	0.366068	1.06042	0.881666	1.20342	0.52135
1369411_at	-1.1263	0.855924	-1.10842	0.884396	-1.22435	0.731767
1369412_a_at	1.06189	0.939061	-1.04093	0.963464	-1.03019	0.971217
1369413_at	-1.08217	0.825485	-1.05284	0.901071	-1.07387	0.847466
1369414_at	1.03669	0.863308	-1.01025	0.967945	1.02499	0.910185
1369415_at	-1.0119	0.990875	-1.00194	0.998431	-1.17961	0.821815
1369416_at	1.02271	0.945521	1.06559	0.838309	-1.01981	0.952138
1369417_a_at	1.02255	0.973816	-1.07008	0.918215	-1.03875	0.952741
1369418_at	1.03252	0.893908	1.09281	0.677295	1.00102	0.99732
1369419_at	1.07103	0.650241	1.15492	0.255485	-1.00706	0.972396
1369420_at	1.02428	0.970042	1.29974	0.589699	1.07824	0.895544
1369421_at	1.00077	0.999045	-1.10147	0.847449	1.10474	0.827141
1369422_at	-1.41661	0.582766	-1.17538	0.840911	-1.21911	0.781277
1369423_at	1.05279	0.882469	1.15819	0.632136	1.00097	0.998165
1369424_at	-1.04118	0.984751	-1.12791	0.950194	1.31011	0.871298
1369425_at	-1.47158	0.674484	-1.40202	0.740789	-1.05243	0.966205
1369426_at	1.03633	0.915306	1.13409	0.664859	-1.00408	0.992632
1369427_at	1.17959	0.752491	-1.00107	0.998952	1.03533	0.956426
1369428_a_at	1.0967	0.569985	1.14765	0.3704	-1.01905	0.930128
1369429_at	1.05766	0.796583	1.11671	0.583396	1.16104	0.370446
1369430_at	1.07492	0.877739	1.13569	0.781482	1.10921	0.813776
1369431_at	-1.0297	0.961132	1.06037	0.923378	-1.08547	0.879177
1369432_at	1.03037	0.90737	-1.04176	0.876509	1.09849	0.652161
1369433_at	-1.02432	0.950751	-1.02132	0.960638	-1.0124	0.977054
1369434_at	1.00256	0.993671	1.00598	0.984621	1.06624	0.758861
1369435_at	1.13823	0.761144	1.19014	0.683144	1.46689	0.199651
1369436_at	1.07677	0.724575	1.15154	0.459419	1.12472	0.525581
1369437_at	1.08779	0.792792	1.11787	0.733429	1.07252	0.831934
1369438_at	1.12288	0.527693	1.21998	0.218728	1.08625	0.677295
1369439_at	1.05386	0.966655	-1.27799	0.82854	-1.2339	0.84814
1369440_at	1.22098	0.681459	-1.04336	0.948313	-1.02516	0.969122
1369441_at	1.10253	0.762088	1.06769	0.860918	-1.05007	0.892173
1369442_at	1.04701	0.849	1.13399	0.541738	1.07357	0.746355
1369443_at	-1.03495	0.943858	-1.20431	0.643187	-1.23528	0.556004
1369444_at	1.0537	0.815395	1.14609	0.481854	1.11456	0.569344
1369445_at	1.1065	0.883027	1.13259	0.864358	1.29229	0.659158
1369446_at	1.03707	0.930679	1.07845	0.85421	1.0376	0.929609
1369447_at	1.12123	0.694199	1.30868	0.258802	1.25134	0.332736
1369448_at	1.04249	0.860918	1.16582	0.413018	-1.01763	0.946014
1369449_at	1.0706	0.77086	1.00655	0.984985	1.10773	0.627359
1369450_at	1.48369	0.531955	-1.0034	0.99746	1.16858	0.840595
[truncated: 29,100 more rows]
